# Supplementary material for: Leaving the Dark Side? Insights Into the Evolution of Luciferases
Source: Preprints.org preprint supplement (doi:10.20944/preprints202103.0144.v2), 2021-05-10
Supplement: Supplementary file 1 [file supplementary]

## Sheet: page 1
Luciferase/Photoprotein-type	Species	Protein name	Taxon	Phylum	Protein family	NCBI Accession	Molecular weight (kDa)	Luciferin	Reference Luciferase/photoprotein	Reference Luciferin
Type I : Bacteria luciferase	(Alii)Vibrio fischeri	Alkanal monooxygenase LuxA luciferase alpha chain	Vibrionales	Gammaproteobacteria		Q6VFQ4 / AAR04022.2		Bacterial luciferin	Ast and Dunlap, 2004	Dunlap and Kita-Tsukamoto, 2006
Type I : Bacteria luciferase	(Alii)Vibrio harveyi	Alkanal monooxygenase LuxA luciferase alpha chain	Vibrionales	Gammaproteobacteria		P07740		Bacterial luciferin	Cohn et al., 1985	Dunlap and Kita-Tsukamoto, 2006
Type I : Bacteria luciferase	(Alii)Vibrio logei	Alkanal monooxygenase LuxA luciferase alpha chain	Vibrionales	Gammaproteobacteria		AEK79972.1		Bacterial luciferin	Khrulnova et al., 2010	Dunlap and Kita-Tsukamoto, 2006
Type I : Bacteria luciferase	(Alii)Vibrio orientalis	Alkanal monooxygenase LuxA luciferase alpha chain	Vibrionales	Gammaproteobacteria		EEX94117.1		Bacterial luciferin		Dunlap and Kita-Tsukamoto, 2006
Type I : Bacteria luciferase	(Alii)Vibrio mediterranea	Alkanal monooxygenase LuxA luciferase alpha chain	Vibrionales	Gammaproteobacteria		/		Bacterial luciferin		Dunlap and Kita-Tsukamoto, 2006
Type I : Bacteria luciferase	(Alii)Vibrio salmonicida	Alkanal monooxygenase LuxA luciferase alpha chain	Vibrionales	Gammaproteobacteria		AAM46720.1		Bacterial luciferin	Nelson et al., 2007	Dunlap and Kita-Tsukamoto, 2006
Type I : Bacteria luciferase	(Alii)Vibrio splendidus	Alkanal monooxygenase LuxA luciferase alpha chain	Vibrionales	Gammaproteobacteria		/		Bacterial luciferin		Dunlap and Kita-Tsukamoto, 2006
Type I : Bacteria luciferase	Photorhabdus asymbiotica	Alkanal monooxygenase LuxA luciferase alpha chain	Enterobacteriales	Gammaproteobacteria		253989991_003041347_1		Bacterial luciferin		Dunlap and Kita-Tsukamoto, 2006
Type I : Bacteria luciferase	Photorhabdus luminescens	Alkanal monooxygenase LuxA luciferase alpha chain	Enterobacteriales	Gammaproteobacteria		P19839.1		Bacterial luciferin	Szittner and Meighen, 1990	Dunlap and Kita-Tsukamoto, 2006
Type I : Bacteria luciferase	Photorhabdus temperata	Alkanal monooxygenase LuxA luciferase alpha chain	Enterobacteriales	Gammaproteobacteria		/		Bacterial luciferin		Dunlap and Kita-Tsukamoto, 2006
Type I : Bacteria luciferase	Photobacterium phosphoreum	Alkanal monooxygenase LuxA luciferase alpha chain	Vibrionales	Gammaproteobacteria		AAX51412.2		Bacterial luciferin	Ast and Dunlap, 2005	Dunlap and Kita-Tsukamoto, 2006
Type I : Bacteria luciferase	Photobacterium leiognathi	Alkanal monooxygenase LuxA luciferase alpha chain	Vibrionales	Gammaproteobacteria		P09140.1		Bacterial luciferin	Illarionov et al., 1988; Ast and Dunlap, 2004	Dunlap and Kita-Tsukamoto, 2006
Type I : Bacteria luciferase	Photobacterium kishitanii	Alkanal monooxygenase LuxA luciferase alpha chain	Vibrionales	Gammaproteobacteria		ABU98298.1		Bacterial luciferin	Ast et al., 2007	Dunlap and Kita-Tsukamoto, 2006
Type I : Bacteria luciferase	Photobacterium aquimaris	Alkanal monooxygenase LuxA luciferase alpha chain	Vibrionales	Gammaproteobacteria		AFK80961.1		Bacterial luciferin	Urbanczyk et al., 2012	Dunlap and Kita-Tsukamoto, 2006
Type I : Bacteria luciferase	Photobacterium damselae	Alkanal monooxygenase LuxA luciferase alpha chain	Vibrionales	Gammaproteobacteria		ABX76858.1		Bacterial luciferin	Urbanczyk et al., 2008	Dunlap and Kita-Tsukamoto, 2006
Type I : Bacteria luciferase	Candidatus photodesmus katoptron	Alkanal monooxygenase LuxA luciferase alpha chain	Vibrionales	Gammaproteobacteria		EPE37470.1		Bacterial luciferin	Hendry et al., 2013	Dunlap and Kita-Tsukamoto, 2006
Type I : Bacteria luciferase	Candidatus photodesmus blepharus	Alkanal monooxygenase LuxA luciferase alpha chain	Vibrionales	Gammaproteobacteria		AFJ93045.1		Bacterial luciferin	Hendry and Dunlap, 2014	Dunlap and Kita-Tsukamoto, 2006
Type I : Bacteria luciferase	Candidatus enterovibrio escacola	Alkanal monooxygenase LuxA luciferase alpha chain	Vibrionales	Gammaproteobacteria		PCS22639.1		Bacterial luciferin	Hendry et al., 2018	Dunlap and Kita-Tsukamoto, 2006
Type I : Bacteria luciferase	Candidatus enterovibrio luxaltus	Alkanal monooxygenase LuxA luciferase alpha chain	Vibrionales	Gammaproteobacteria		ATF10302.1		Bacterial luciferin	Hendry et al., 2018	Dunlap and Kita-Tsukamoto, 2006
Type I : Bacteria luciferase	Shewanella hanedai	Alkanal monooxygenase LuxA luciferase alpha chain	Alteromonadales	Gammaproteobacteria		BAB40796.1		Bacterial luciferin	Urbanczyk et al., 2008	Dunlap and Kita-Tsukamoto, 2006
Type I : Bacteria luciferase	Shewanella woodyi	Alkanal monooxygenase LuxA luciferase alpha chain	Alteromonadales	Gammaproteobacteria		BAF93451.1		Bacterial luciferin	Zhang et al., 2008	Dunlap and Kita-Tsukamoto, 2006
Type II: Dinoflagellata luciferase	Noctiluca scintillans	Luciferase	Noctilucales	Dinoflagellata		AED02505.1		Dinoflagellate luciferin	Liu and Hastings, 2007	Liu and Hastings, 2007
Type II: Dinoflagellata luciferase	Pyrocystis noctiluca	Luciferase	Pyrocystales	Dinoflagellata		AAV35380_1		Dinoflagellate luciferin	Liu et al., 2004	Dunlap and Hastings, 1981; Dunlap et al., 1981; Nakamura et al., 1989
Type II: Dinoflagellata luciferase	Pyrocystis lunula	Luciferase	Pyrocystales	Dinoflagellata		AAL40677.1		Dinoflagellate luciferin	Okamoto et al., 2001	Dunlap and Hastings, 1981; Dunlap et al., 1981; Nakamura et al., 1989
Type II: Dinoflagellata luciferase	Pyrocystis fusiformis	Luciferase	Pyrocystales	Dinoflagellata		AAV35379.1		Dinoflagellate luciferin	Liu et al., 2004	Dunlap and Hastings, 1981; Dunlap et al., 1981; Nakamura et al., 1989
Type II: Dinoflagellata luciferase	Protoceratium reticulatum	Luciferase	Gonyaulacales	Dinoflagellata		AAV35381.1		Dinoflagellate luciferin	Liu et al., 2004	Dunlap and Hastings, 1981; Dunlap et al., 1981; Nakamura et al., 1989
Type II: Dinoflagellata luciferase	Lingulodinium polyedrum (Gonyaulax polyedra)	Luciferase	Gonyaulacales	Dinoflagellata		PO77206/AAC36472.1	130	Dinoflagellate luciferin	Li et al., 1997	Dunlap and Hastings, 1981; Dunlap et al., 1981; Nakamura et al., 1989
Type II: Dinoflagellata luciferase	Alexandrium tamarense	Luciferase	Gonyaulacales	Dinoflagellata		AAV35378.1		Dinoflagellate luciferin	Liu et al., 2004	Dunlap and Hastings, 1981; Dunlap et al., 1981; Nakamura et al., 1989
Type II: Dinoflagellata luciferase	Alexandrium affine	Luciferase	Gonyaulacales	Dinoflagellata		AAV35377.1		Dinoflagellate luciferin	Liu et al., 2004	Dunlap and Hastings, 1981; Dunlap et al., 1981; Nakamura et al., 1989
Type II: Dinoflagellata luciferase	Alexandrium fundyense	Luciferase, partial	Gonyaulacales	Dinoflagellata		AEW67906		Dinoflagellate luciferin	Fajardo et al., 2020	Dunlap and Hastings, 1981; Dunlap et al., 1981; Nakamura et al., 1990
Type II: Dinoflagellata luciferase	Alexandrium monilatum	Luciferase, partial	Gonyaulacales	Dinoflagellata		AEW67931		Dinoflagellate luciferin	Fajardo et al., 2020	Dunlap and Hastings, 1981; Dunlap et al., 1981; Nakamura et al., 1991
Type II: Dinoflagellata luciferase	Alexandrium ostenfeldii	Luciferase, partial	Gonyaulacales	Dinoflagellata		AOG16037		Dinoflagellate luciferin	Fajardo et al., 2020	Dunlap and Hastings, 1981; Dunlap et al., 1981; Nakamura et al., 1992
Type II: Dinoflagellata luciferase	Coratocorys horrida	Luciferase, partial	Gonyaulacales	Dinoflagellata		AEW67919		Dinoflagellate luciferin	Fajardo et al., 2020	Dunlap and Hastings, 1981; Dunlap et al., 1981; Nakamura et al., 1993
Type II: Dinoflagellata luciferase	Gonyaulax spinifera	Luciferase, partial	Gonyaulacales	Dinoflagellata		ABO61069		Dinoflagellate luciferin	Baker et al., 2008; Fajardo et al., 2020	Dunlap and Hastings, 1981; Dunlap et al., 1981; Nakamura et al., 1994
Type II: Dinoflagellata luciferase	Pyrodinium bahamense	Luciferase, partial	Gonyaulacales	Dinoflagellata		KX377172		Dinoflagellate luciferin	Fajardo et al., 2020	Dunlap and Hastings, 1981; Dunlap et al., 1981; Nakamura et al., 1995
Type II: Dinoflagellata luciferase	Tripos digitatus	Luciferase, partial	Gonyaulacales	Dinoflagellata		AEW67915		Dinoflagellate luciferin	Fajardo et al., 2020	Dunlap and Hastings, 1981; Dunlap et al., 1981; Nakamura et al., 1996
Type III: Fungi luciferase	Mycena chlorophos	Luciferase, partial	Agaricales	Basidiomycota (Fungi)		BBH43507.1		3-hydroxyhispidin	Kotlobay et al., 2018	Purtov et al., 2015
Type III: Fungi luciferase	Mycena citricolor	Luciferase, partial	Agaricales	Basidiomycota (Fungi)		BBH43506.1		3-hydroxyhispidin	Kotlobay et al., 2018	Purtov et al., 2015
Type III: Fungi luciferase	Mycena sanguinolenta	Luciferase	Agaricales	Basidiomycota (Fungi)		KAF7354547.1		3-hydroxyhispidin	Ke et al., 2020	Purtov et al., 2015
Type III: Fungi luciferase	Mycena venus	Luciferase	Agaricales	Basidiomycota (Fungi)		KAF7328494.1		3-hydroxyhispidin	Ke et al., 2020	Purtov et al., 2015
Type III: Fungi luciferase	Armillaria mellea	Luciferase, partial	Agaricales	Basidiomycota (Fungi)		BBH43504.1		3-hydroxyhispidin	Kotlobay et al., 2018	Purtov et al., 2015
Type III: Fungi luciferase	Armillaria fuscipes	Luciferase, partial	Agaricales	Basidiomycota (Fungi)		BBH43502		3-hydroxyhispidin	Kotlobay et al., 2018	Purtov et al., 2015
Type III: Fungi luciferase	Armillaria ostoyae	Luciferase, partial	Agaricales	Basidiomycota (Fungi)		BBH43505.1		3-hydroxyhispidin	Kotlobay et al., 2018	Purtov et al., 2015
Type III: Fungi luciferase	Armillaria gallica	Luciferase, partial	Agaricales	Basidiomycota (Fungi)		BBH43503.1		3-hydroxyhispidin	Kotlobay et al., 2018	Purtov et al., 2015
Type III: Fungi luciferase	Armillaria borealis	Luciferase	Agaricales	Basidiomycota (Fungi)		/		3-hydroxyhispidin	Purtov et al., 2015	Purtov et al., 2015
Type III: Fungi luciferase	Panellus stipticus	Luciferase, partial	Agaricales	Basidiomycota (Fungi)		BBH43512.1		3-hydroxyhispidin	Kotlobay et al., 2018	Purtov et al., 2015
Type III: Fungi luciferase	Omphalotus olearius	Luciferase, partial	Agaricales	Basidiomycota (Fungi)		BBH43510.1		3-hydroxyhispidin	Kotlobay et al., 2018	Purtov et al., 2015
Type III: Fungi luciferase	Neonothopanus gardneri	Luciferase, partial	Agaricales	Basidiomycota (Fungi)		BBH43508.1		3-hydroxyhispidin	Kotlobay et al., 2018	Purtov et al., 2015
Type III: Fungi luciferase	Neonothopanus nambi	Luciferase, partial	Agaricales	Basidiomycota (Fungi)		BBH43509.1		3-hydroxyhispidin	Kotlobay et al., 2018	Purtov et al., 2015
Type IV: Ctenophora/Medusozoa photoprotein	Aequorea victoria	Aequorin 1 Chain A	Hydrozoa	Cnidaria		pdb_1SL8		Coelenterazine	Deng et al., 2009	Haddock et al., 2001
Type IV: Ctenophora/Medusozoa photoprotein	Aequorea victoria	Aequorin-2	Hydrozoa	Cnidaria		P02592_1		Coelenterazine	Inouye et al., 1985	Haddock et al., 2001
Type IV: Ctenophora/Medusozoa photoprotein	Aequorea coerulescens	Aequorin	Hydrozoa	Cnidaria		AAO91813.1		Coelenterazine	Gurskaya et al., 2003	Gurskaya et al., 2003
Type IV: Ctenophora/Medusozoa photoprotein	Aequorea macrodactyla	Apoaequorin	Hydrozoa	Cnidaria		AAK02061.1		Coelenterazine	Xia et al., 2002	Xia et al., 2002
Type IV: Ctenophora/Medusozoa photoprotein	Aequorea parva	Apoaequorin	Hydrozoa	Cnidaria		AAK02060.1		Coelenterazine	Wenxin et al., 2004	Wenxin et al., 2004
Type IV: Ctenophora/Medusozoa photoprotein	Obelia geniculata	Obelin OG2	Hydrozoa	Cnidaria		AIU48034.1		Coelenterazine	Markova et al., 2002	Markova et al., 2002
Type IV: Ctenophora/Medusozoa photoprotein	Obelia longissima	Obelin Chain A	Hydrozoa	Cnidaria		Pdb 4MRY.A		Coelenterazine	Natashin et al., 2014	Liu et al., 2003
Type IV: Ctenophora/Medusozoa photoprotein	Obelia longissima	Obelin Chain A	Hydrozoa	Cnidaria		pdb_2F8P		Coelenterazine	Liu et al., 2006	Liu et al., 2003
Type IV: Ctenophora/Medusozoa photoprotein	Obelia longissima	Obelin Chain A	Hydrozoa	Cnidaria		pdb_1SL9_A		Coelenterazine	Vysotski et al., 1999	Liu et al., 2003
Type IV: Ctenophora/Medusozoa photoprotein	Obelia longissima	Obelin Chain A	Hydrozoa	Cnidaria		pdb_1QV1_A		Coelenterazine	Vysotski et al., 1999	Liu et al., 2003
Type IV: Ctenophora/Medusozoa photoprotein	Obelia longissima	Obelin Chain A	Hydrozoa	Cnidaria		pdb_1JF2		Coelenterazine	Vysotski et al., 2003	Liu et al., 2003
Type IV: Ctenophora/Medusozoa photoprotein	Obelia longissima	Obelin Chain A	Hydrozoa	Cnidaria		4MRX_A		Coelenterazine	Natashin et al., 2014	Liu et al., 2003
Type IV: Ctenophora/Medusozoa photoprotein	Obelia longissima	Obelin Chain A	Hydrozoa	Cnidaria		1EL4_A		Coelenterazine	Vysotski et al., 1999	Liu et al., 2003
Type IV: Ctenophora/Medusozoa photoprotein	Obelia longissima	Obelin	Hydrozoa	Cnidaria		Q27709.1		Coelenterazine	Illarionov et al., 1995	Liu et al., 2003
Type IV: Ctenophora/Medusozoa photoprotein	Mitrocoma cellularia	Mitrocomin Chain B	Hydrozoa	Cnidaria		Pdb 4NQG.B		Coelenterazine	Fagan et al., 1993; Burakova et al., 2016	Fagan et al., 1993; Burakova et al., 2016
Type IV: Ctenophora/Medusozoa photoprotein	Mitrocoma cellularia	Mitrocomin Chain A	Hydrozoa	Cnidaria		Pdb 4NQG.A		Coelenterazine	Fagan et al., 1993; Burakova et al., 2016	Fagan et al., 1993; Burakova et al., 2016
Type IV: Ctenophora/Medusozoa photoprotein	Clytia hemisphaerica	Clytin 1	Hydrozoa	Cnidaria		AEP19818_1		coelenterazine	Fourrage et al., 2014	Fourrage et al., 2014
Type IV: Ctenophora/Medusozoa photoprotein	Clytia hemisphaerica	Clytin 3	Hydrozoa	Cnidaria		AEP19820.1		coelenterazine	Fourrage et al., 2014	Fourrage et al., 2014
Type IV: Ctenophora/Medusozoa photoprotein	Clytia hemisphaerica	Clytin 2	Hydrozoa	Cnidaria		AEP19819.1		coelenterazine	Fourrage et al., 2014	Fourrage et al., 2014
Type IV: Ctenophora/Medusozoa photoprotein	Clytia gregaria	Obelin Chain A Clytin	Hydrozoa	Cnidaria		pdb_3KPX		Coelenterazine	Titushin et al., 2010	Malikova et al., 2011
Type IV: Ctenophora/Medusozoa photoprotein	Clytia gregaria	Clytin II, partial	Hydrozoa	Cnidaria		BAG49088.1		coelenterazine	Inouye, 2008	Malikova et al., 2011
Type IV: Ctenophora/Medusozoa photoprotein	Clytia gregaria	Clytin II, partial	Hydrozoa	Cnidaria		BAG49087.1		coelenterazine	Inouye, 2008	Malikova et al., 2011
Type IV: Ctenophora/Medusozoa photoprotein	Clytia gregaria	Clytin I, partial	Hydrozoa	cnidaria		BAG49091.1		coelenterazine	Inouye, 2008	Malikova et al., 2011
Type IV: Ctenophora/Medusozoa photoprotein	Clytia gregaria	Clytin I, partial	Hydrozoa	cnidaria		BAG49090.1		coelenterazine	Inouye, 2008	Malikova et al., 2011
Type IV: Ctenophora/Medusozoa photoprotein	Mnemiopsis leidyi	Mnemiopsin 1	Tentaculata	Ctenophora		ADD70248.1		coelenterazine	Aghamaali et al., 2011; Jafarian et al., 2011	Bessho-Uehara et al., 2020b
Type IV: Ctenophora/Medusozoa photoprotein	Mnemiopsis leidyi	Mnemiopsin 2	Tentaculata	Ctenophora		ADM86930.1		coelenterazine	Aghamaali et al., 2011; Jafarian et al., 2011	Bessho-Uehara et al., 2020b
Type IV: Ctenophora/Medusozoa photoprotein	Mnemiopsis leidyi	Mnemiopsin 2, partial	Tentaculata	Ctenophora		AIC83166.1		coelenterazine	Aghamaali et al., 2011; Jafarian et al., 2011	Bessho-Uehara et al., 2020b
Type IV: Ctenophora/Medusozoa photoprotein	Mnemiopsis leidyi	Photoprotein 1	Tentaculata	Ctenophora		AFK83778.1		coelenterazine	Schnitzler et al., 2012	Bessho-Uehara et al., 2020b
Type IV: Ctenophora/Medusozoa photoprotein	Mnemiopsis leidyi	Photoprotein 2	Tentaculata	Ctenophora		AFK83779.1		coelenterazine	Schnitzler et al., 2012	Bessho-Uehara et al., 2020b
Type IV: Ctenophora/Medusozoa photoprotein	Mnemiopsis leidyi	Photoprotein 3	Tentaculata	Ctenophora		AFK83780.1		coelenterazine	Schnitzler et al., 2012	Bessho-Uehara et al., 2020b
Type IV: Ctenophora/Medusozoa photoprotein	Mnemiopsis leidyi	Photoprotein 4	Tentaculata	Ctenophora		AFK83781.1		coelenterazine	Schnitzler et al., 2012	Bessho-Uehara et al., 2020b
Type IV: Ctenophora/Medusozoa photoprotein	Mnemiopsis leidyi	Photoprotein 5	Tentaculata	Ctenophora		AFK83782.1		coelenterazine	Schnitzler et al., 2012	Bessho-Uehara et al., 2020b
Type IV: Ctenophora/Medusozoa photoprotein	Mnemiopsis leidyi	Photoprotein 6	Tentaculata	Ctenophora		AFK83783.1		coelenterazine	Schnitzler et al., 2012	Bessho-Uehara et al., 2020b
Type IV: Ctenophora/Medusozoa photoprotein	Mnemiopsis leidyi	Photoprotein 7	Tentaculata	Ctenophora		AFK83784.1		coelenterazine	Schnitzler et al., 2012	Bessho-Uehara et al., 2020b
Type IV: Ctenophora/Medusozoa photoprotein	Mnemiopsis leidyi	Photoprotein 8	Tentaculata	Ctenophora		AFK83785.1		coelenterazine	Schnitzler et al., 2012	Bessho-Uehara et al., 2020b
Type IV: Ctenophora/Medusozoa photoprotein	Mnemiopsis leidyi	Photoprotein 9	Tentaculata	Ctenophora		AFK83786.1		coelenterazine	Schnitzler et al., 2012	Bessho-Uehara et al., 2020b
Type IV: Ctenophora/Medusozoa photoprotein	Mnemiopsis leidyi	Photoprotein 10	Tentaculata	Ctenophora		AFK83787.1		coelenterazine	Schnitzler et al., 2012	Bessho-Uehara et al., 2020b
Type IV: Ctenophora/Medusozoa photoprotein	Beroe abyssicola	Apoberovin 1	Nuda	Ctenophora		AFE88609.1		coelenterazine	Stepanyuk et al., 2013	Markova et al., 2012; Stepanyuk et al., 2013
Type IV: Ctenophora/Medusozoa photoprotein	Beroe abyssicola	Apoberovin 2	Nuda	Ctenophora		AFE88610.1		coelenterazine	Stepanyuk et al., 2013	Markova et al., 2012; Stepanyuk et al., 2013
Type IV: Ctenophora/Medusozoa photoprotein	Beroe abyssicola	Apoberovin 3	Nuda	Ctenophora		AFE88611.1		coelenterazine	Stepanyuk et al., 2013	Markova et al., 2012; Stepanyuk et al., 2013
Type IV: Ctenophora/Medusozoa photoprotein	Beroe abyssicola	Apoberovin 4	Nuda	Ctenophora		AFE88612.1		coelenterazine	Stepanyuk et al., 2013	Markova et al., 2012; Stepanyuk et al., 2013
Type IV: Ctenophora/Medusozoa photoprotein	Beroe abyssicola	Chain A, Photoprotein Berovin	Nuda	Ctenophora		2HPK_A		Coelenterazine	Stepanyuk et al., 2013	Stepanyuk et al., 2013
Type IV: Ctenophora/Medusozoa photoprotein	Beroe ovata	Berovin	Nuda	Ctenophora		/	25	Coelenterazine	Ward and Seliger, 1974	Ward and Seliger, 1974
Type IV: Ctenophora/Medusozoa photoprotein	Bathocyroe fosteri	BfosPP	Tentaculata	Ctenophora		/		Coelenterazine	Powers et al., 2013	Powers et al., 2013
Type V: Insecta luciferase	Photinus pyralis	Luciferase	Insecta	Arthropoda		AAA29795.1	60.7	D-luciferin	Green and McElroy, 1956; De Wet et al., 1985, 1987	Bitler and McElroy, 1957; De Wet et al., 1985, 1987
Type V: Insecta luciferase	Photinus scintillans	Luciferase	Insecta	Arthropoda		AOG75000.1		D-luciferin	Branchini et al., 2016a	Branchini et al., 2016a
Type V: Insecta luciferase	Luciola mingrelica	Luciferase	Insecta	Arthropoda		AAB26932_1	60.4	D-luciferin	Devine et al., 1993	Devine et al., 1993
Type V: Insecta luciferase	Luciola lateralis	Luciferase type BU	Insecta	Arthropoda		AAN73267_1	60.1	D-luciferin	Tatsumi et al., 1992; Kim et al., 2004	Tatsumi et al., 1992; Kim et al., 2004
Type V: Insecta luciferase	Luciola cruciata	Luciferase	Insecta	Arthropoda		BAW94790_1	60	D-luciferin	Tsutomu et al., 1989; Oba et al., 2006	Kishi et al., 1968; Tsutomu et al., 1989; Oba et al., 2006
Type V: Insecta luciferase	Luciola italica	Luciferase	Insecta	Arthropoda		ABA03040_1		D-luciferin	Branchini et al., 2006	Branchini et al., 2006
Type V: Insecta luciferase	Luciola parvula	Luciferase	Insecta	Arthropoda		BAU71688_1	60.1	D-luciferin	Bessho-Uehara and Oba, 2017	Bessho-Uehara and Oba, 2017
Type V: Insecta luciferase	Luciola terminalis	Luciferase	Insecta	Arthropoda		ABZ88151.1		D-luciferin
Type V: Insecta luciferase	Lampyris turkestanicus	Luciferase	Insecta	Arthropoda		AAU85360.1		D-luciferin	Alipour et al., 2004	Alipour et al., 2004
Type V: Insecta luciferase	Lampyris noctiluca	photinus-luciferin 4-monooxygenase	Insecta	Arthropoda		CAA61668.1	60.4	D-luciferin	Sala-Newby et al., 1996	Sala-Newby et al., 1996
Type V: Insecta luciferase	Lampyroidea maculata	Luciferase	Insecta	Arthropoda		AAZ74651.1		D-luciferin	Emamzadeh et al., 2006	Emamzadeh et al., 2006
Type V: Insecta luciferase	Lamprigera yunnana	Luciferyl adenylate	Insecta	Arthropoda		QCB16336.1		D-luciferin	Liu et al., 2019b	Liu et al., 2019b
Type V: Insecta luciferase	Lamprohiza splendidula	Luciferase, partial	Insecta	Arthropoda		ACH87783.1		D-luciferin	Day et al., 2009
Type V: Insecta luciferase	Pyrocoelia rufa	Luciferase	Insecta	Arthropoda		AAR20793.1	69	D-luciferin	Lee et al., 2001	Lee et al., 2001
Type V: Insecta luciferase	Pyrocoelia rufa	Luciferase	Insecta	Arthropoda		AAG45439.1		D-luciferin	Lee et al., 2001	Lee et al., 2001
Type V: Insecta luciferase	Pyrocoelia miyako	Luciferase	Insecta	Arthropoda		AAC37254.1	61	D-luciferin	Ohmiya et al., 1995	Ohmiya et al., 1995
Type V: Insecta luciferase	Pyrocoelia pectoralis	Luciferase	Insecta	Arthropoda		ABM21578.1		D-luciferin	Wang et al., 2017
Type V: Insecta luciferase	Pyrocoelia pygidialis	Luciferase	Insecta	Arthropoda		ACF61063.1	70	D-luciferin	Dong et al., 2008	Dong et al., 2008
Type V: Insecta luciferase	Pyrocoelia atripennis	Luc1-type luciferase	Insecta	Arthropoda		BAW87786.1		D-luciferin	Bessho-Uehara et al., 2017	Bessho-Uehara et al., 2017
Type V: Insecta luciferase	Photuris pensylvanica	Luciferase	Insecta	Arthropoda		BAA05005.1	61	D-luciferin	Ye et al., 1997	Ye et al., 1997
Type V: Insecta luciferase	Photuris pensylvanica	Luciferase	Insecta	Arthropoda		BAA05006.1	61	D-luciferin	Ye et al., 1997	Ye et al., 1997
Type V: Insecta luciferase	Photuris pensylvanica	Luciferase	Insecta	Arthropoda		AAB60897.1		D-luciferin	Ye et al., 1997	Ye et al., 1997
Type V: Insecta luciferase	Hoturia unmunsana	Luciferase	Insecta	Arthropoda		AAM00429.1	61	D-luciferin	Choi et al., 2002	Choi et al., 2002
Type V: Insecta luciferase	Hoturia papariensis	Luciferase	Insecta	Arthropoda		AAN40978.1		D-luciferin	Choi et al., 2003
Type V: Insecta luciferase	Hoturia tsushimana	Luciferase	Insecta	Arthropoda		AAN40979.1		D-luciferin	Choi et al., 2003
Type V: Insecta luciferase	Pyrophorus plagiophthalamus	Photinus-luciferin 4-monooxygenase	Insecta	Arthropoda		S29353	60.5	D-luciferin	Wood et al., 1989	Wood et al., 1989
Type V: Insecta luciferase	Pyrophorus plagiophthalamus	Photinus-luciferin 4-monooxygenase	Insecta	Arthropoda		Q7M4K3		D-luciferin	Wood et al., 1989	Wood et al., 1989
Type V: Insecta luciferase	Pyrophorus mellifluus	luciferase	Insecta	Arthropoda		AAQ19141.1		D-luciferin	Stolz et al., 2003
Type V: Insecta luciferase	Pyrophorus mellifluus	Luciferase	Insecta	Arthropoda		AAQ19142.1		D-luciferin	Stolz et al., 2003
Type V: Insecta luciferase	Pyrophorus angustus	Luciferase	Insecta	Arthropoda		BAI66600.1	60.7	D-luciferin	Oba et al., 2010b	Oba et al., 2010b
Type V: Insecta luciferase	Phrixothrix hirtus	Luciferase	Insecta	Arthropoda		ACT68597.1	60.8	D-luciferin	Viviani et al., 1999a	Viviani et al., 1999a
Type V: Insecta luciferase	Phrixothrix vivianii	Luciferase	Insecta	Arthropoda		AAD34542.1	59.6	D-luciferin	Viviani et al., 1999a	Viviani et al., 1999a
Type V: Insecta luciferase	Cratomorphus distinctus	Luciferase	Insecta	Arthropoda		AAV32457.1		D-luciferin	Viviani et al., 2004	Viviani et al., 2004
Type V: Insecta luciferase	Diaphanes pectinealis	Luciferase	Insecta	Arthropoda		ABD66580.1		D-luciferin	Li et al., 2006
Type V: Insecta luciferase	Rhagophthalmus ohbai	Luciferase	Insecta	Arthropoda		BAF34360.1		D-luciferin	Li et al., 2007	Ohmiya et al., 2000
Type V: Insecta luciferase	Menghuoius giganteus	Luciferase	Insecta	Arthropoda		QGJ83190.1		D-luciferin	Liu et al., 2019a	Liu et al., 2019a
Type V: Insecta luciferase	Phausis reticulata	Luciferase	Insecta	Arthropoda		AOG74999.1		D-luciferin	Branchini et al., 2016b	Branchini et al., 2016b
Type V: Insecta luciferase	Nyctophila cf. caucasica	Luciferase	Insecta	Arthropoda		AAY99776.1		D-luciferin	Day et al., 2006
Type V: Insecta luciferase	Nyctophila reichii	Luciferase, partial	Insecta	Arthropoda		ACH87790.1		D-luciferin	Day et al., 2009
Type V: Insecta luciferase	Cyphonocerus ruficollis	Firefly luciferase	Insecta	Arthropoda		BAL40874.1		D-luciferin	Oba et al., 2012	Oba et al., 2012
Type V: Insecta luciferase	Photophorus jansonii	Luciferase	Insecta	Arthropoda		BAN28458.1		D-luciferin	Mitani et al., 2013	Mitani et al., 2013
Type V: Insecta luciferase	Amydetes vivianii	Luciferase	Insecta	Arthropoda		6AAA_B	60.5	D-luciferin	Carrasco-Lopez et al., 2018	Viviani et al., 2011
Type V: Insecta luciferase	Pyrearinus termitilluminans	Luciferase	Insecta	Arthropoda		/	60.7	D-luciferin	Silva Neto et al., 2009	Viviani et al., 1999b
Type V: Insecta luciferase	Fulgeochlizus bruchi	Luciferase	Insecta	Arthropoda		/	60.8	D-luciferin	Amaral et al., 2012	Amaral et al., 2012
Type V: Insecta luciferase	Arachnocampa luminosa	Luciferase	Insecta	Arthropoda		AXM90651.1	/	LRC luciferin	Sharpe et al., 2015	Watkins et al., 2018
Type V: Insecta luciferase	Arachnocampa flava	Luciferase	Insecta	Arthropoda		/	36	unknown luciferin	Viviani et al., 2002	Viviani et al., 2002
Type V: Insecta luciferase	Suberites domuncula	LUC_SUBDO	Heteroscleromorpha	Porifera		CAR31336.1	/	D-luciferin-like	Müller et al., 2009	Müller et al., 2009
Type V: Insecta luciferase	Watasenia scintillans	LUC-like protein 4	Cephalopoda	Mollusca		AXM90650.1	/	Coelenterazine disulfate	Gimenez et al., 2016	Inoue et al., 1976a; Tsujii, 2002
Type V: Insecta luciferase	Watasenia scintillans	LUC-like protein 3	Cephalopoda	Mollusca		AXM90649.1	/	Coelenterazine disulfate	Gimenez et al., 2016	Inoue et al., 1976a; Tsujii, 2002
Type V: Insecta luciferase	Watasenia scintillans	LUC-like protein 2	Cephalopoda	Mollusca		AXM90648.1	/	Coelenterazine disulfate	Gimenez et al., 2016	Inoue et al., 1976a; Tsujii, 2002
Type V: Insecta luciferase	Watasenia scintillans	LUC-like protein 1	Cephalopoda	Mollusca		AXM90647.1	/	Coelenterazine disulfate	Gimenez et al., 2016	Inoue et al., 1976a; Tsujii, 2002
Type VI: Renilla luciferase	Renilla reniformis	Coelenterazine h 2-monooxygenase	Anthozoa	Cnidaria		P27652.1, CAA01908.1	/	Coelenterazine	Lorenz et al., 1991	Hori et al., 1977
Type VI: Renilla luciferase	Renilla muelleri	Luciferase	Anthozoa	Cnidaria		AAG54094.1	/	Coelenterazine	Bryan and Sent-Gyorgyi, 1999	Titushin et al., 2008; Markova and Vysotski, 2015
Type VI: Renilla luciferase	Amphiura filiformis	Luciferase	Ophiuroidea	Echinodermata		a12_20130330_contig_313061	/	Coelenterazine	Delroisse et al., 2017	Mallefet et al., 2020
Type VI: Renilla luciferase	Amphiura filiformis	Luciferase	Ophiuroidea	Echinodermata		Unigene63701_6	/	Coelenterazine	Delroisse et al., 2017	Mallefet et al., 2020
Type VI: Renilla luciferase	Amphiura filiformis	Luciferase	Ophiuroidea	Echinodermata		Unigene7971_6	/	Coelenterazine	Delroisse et al., 2017	Mallefet et al., 2020
Type VI: Renilla luciferase	Amphiura filiformis	Luciferase	Ophiuroidea	Echinodermata		a12_20130330_contig_224433	/	Coelenterazine	Delroisse et al., 2017	Mallefet et al., 2020
Type VI: Renilla luciferase	Pyrosoma atlanticum	Luciferase	Thaliacea	Urochordata		DN14459	/	Coelenterazine	Delroisse et al., 2017	Tessler et al., 2020
Type VII: Stheunoteuthis photoprotein	Sthenoteuthis oualaniensis	Symplectin	Cephalopoda	Mollusca		BAH89068.1	60	dehydrocoelenterazine	Takahashi and Isobe, 1994; Fujii et al., 2002	Takahashi and Isobe, 1994; Isobe et al., 2002
Type VII: Stheunoteuthis photoprotein	Sthenoteuthis oualaniensis	Symplectin	Cephalopoda	Mollusca		C6KYS2.2	60	dehydrocoelenterazine	Takahashi and Isobe, 1994; Fujii et al., 2002	Takahashi and Isobe, 1994; Isobe et al., 2002
Type VII: Stheunoteuthis photoprotein	Dosidicus gigas	Symplectin/biotinidase-like	Cephalopoda	Mollusca		AXB88462.1	60	dehydrocoelenterazine	Francis et al., 2017; Galeazzo et al., 2019	Galeazzo et al., 2019
Type VIII: Pholas photoprotein	Pholas dactylus	Pholasin	Bivalvia	Mollusca		CAA10293.1	46	dehydrocoelenterazine	Dunstan et al., 2000	Kuse et al., 2008
Type VIII: Pholas photoprotein	Pholas dactylus	Pholasin	Bivalvia	Mollusca		AAM18085.1	/	dehydrocoelenterazine	Dunstan et al., 2000	Kuse et al., 2008
Type VIII: Pholas photoprotein	Pholas dactylus	Pholasin	Bivalvia	Mollusca		CAA10294.1	/	dehydrocoelenterazine	Dunstan et al., 2000	Kuse et al., 2008
Type VIII: Pholas photoprotein	Pholas dactylus	Pholasin	Bivalvia	Mollusca		CAA10292.1	/	dehydrocoelenterazine	Dunstan et al., 2000	Kuse et al., 2008
Type IX: Oplophorus luciferase	Oplophorus gracilirostris	Oxygenase	Decapoda, Crustacea	Arthropoda		AB030245.1/BAB13776.1	19.35	Coelenterazine	Inouye et al., 2000	Inouye et al., 2000
Type IX: Oplophorus luciferase	Oplophorus spinosus	Luciferase	Decapoda, Crustacea	Arthropoda		/	/	Coelenterazine		Inoue et al., 1976b; Thompson et al., 1995a
Type X: Ostracoda luciferase	Cypridina noctiluca	Luciferase	Ostracoda, Crustacea	Arthropoda		BAD08210.1	61.4	Cypridina-type luciferin (Vargulin)	Nakajima et al., 2004	Nakajima et al., 2004
Type X: Ostracoda luciferase	Vargula hilgendorfii	Luciferin 2-monooxygenase	Ostracoda, Crustacea	Arthropoda		AAB86460.1/ P17554.1	62.2	Cypridina-type luciferin (Vargulin)	Thompson et al., 1989	Shimomura et al., 1957; Kishi et al., 1966
Type X: Ostracoda luciferase	Vargula norvegica	Luciferase	Ostracoda, Crustacea	Arthropoda		/	/	Cypridina-type luciferin (Vargulin)		Shimomura, 2006
Type X: Ostracoda luciferase	Parapriacanthus ransonneti	Luciferase	Teleostei	Vertebrata		/	/	Cypridina-type luciferin (Vargulin)	Bessho-Uehara et al., 2020c	Bessho-Uehara et al., 2020c
Type X: Ostracoda luciferase	Parapriacanthus bercyformes	Luciferase	Teleostei	Vertebrata		/	/	Cypridina-type luciferin (Vargulin)		Johnson et al., 1961
Unknown luciferase	Porychthys notatus	Luciferase	Teleostei	Vertebrata		/	/	Cypridina-type luciferin (Vargulin)		Tsuji et al., 1972
Type XI: Copepoda luciferase	Lucicutia ovaliformis	Secreted luciferase	Copepoda	Arthropoda		BAL63036.1	24.2	Coelenterazine	Takenaka et al., 2012	Takenaka et al., 2012, 2013; Markova and Vysostski, 2015
Type XI: Copepoda luciferase	Heterostylites major	Secreted luciferase	Copepoda	Arthropoda		BAL63041.1	22.6	Coelenterazine	Takenaka et al., 2012	Takenaka et al., 2012, 2013; Markova and Vysostski, 2015
Type XI: Copepoda luciferase	Heterostylites major	Secreted luciferase	Copepoda	Arthropoda		BAL63042.1	22.6	Coelenterazine	Takenaka et al., 2012	Takenaka et al., 2012, 2013; Markova and Vysostski, 2015
Type XI: Copepoda luciferase	Heterorhabdus tanneri	Secreted luciferase	Copepoda	Arthropoda		BAL63040.1	19	Coelenterazine	Takenaka et al., 2012	Takenaka et al., 2012, 2013; Markova and Vysostski, 2015
Type XI: Copepoda luciferase	Pleuromamma abdominalis	Secreted luciferase	Copepoda	Arthropoda		BAL63035.1	23.1	Coelenterazine	Takenaka et al., 2012	Takenaka et al., 2012; Markova and Vysostski, 2015
Type XI: Copepoda luciferase	Pleuromamma abdominalis	Secreted luciferase	Copepoda	Arthropoda		BAL63034.1	23.1	Coelenterazine	Takenaka et al., 2012	Takenaka et al., 2012; Markova and Vysostski, 2015
Type XI: Copepoda luciferase	Pleuromamma xiphias	Secreted luciferase	Copepoda	Arthropoda		BAN91829.1	/	Coelenterazine	Takenaka et al., 2013	Takenaka et al., 2012, 2013
Type XI: Copepoda luciferase	Pleuromamma xiphias	Secreted luciferase, partial	Copepoda	Arthropoda		BAN91830.1	/	Coelenterazine	Takenaka et al., 2013	Takenaka et al., 2012, 2013
Type XI: Copepoda luciferase	Pleuromamma xiphias	Secreted luciferase	Copepoda	Arthropoda		BAN91832.1	/	Coelenterazine	Takenaka et al., 2013	Takenaka et al., 2012, 2013
Type XI: Copepoda luciferase	Pleuromamma scutullata	Secreted luciferase	Copepoda	Arthropoda		BAN91828.1/ BAN91827.1	/	Coelenterazine	Takenaka et al., 2013	Takenaka et al., 2012, 2013; Markova and Vysostski, 2015
Type XI: Copepoda luciferase	Metridia pacifica	Secreted luciferase	Copepoda	Arthropoda		BAD93334.1	20.3–22.7	Coelenterazine	Takenaka et al., 2008	Oba et al., 2009; Markova et al., 2018
Type XI: Copepoda luciferase	Metridia pacifica	Secreted luciferase	Copepoda	Arthropoda		BAY00656.1	20.3–22.7	Coelenterazine	Ishida et al., 2018	Oba et al., 2009; Markova et al., 2018
Type XI: Copepoda luciferase	Metridia pacifica	Secreted luciferase	Copepoda	Arthropoda		BBK03599.1	20.3–22.7	Coelenterazine	Matsui et al., 2017	Oba et al., 2009; Markova et al., 2018
Type XI: Copepoda luciferase	Metridia longa	Secreted luciferase	Copepoda	Arthropoda		ABW06650.1	18.4–23.9	Coelenterazine	Markova et al., 2003; Borisova et al., 2008	Markova et al., 2018
Type XI: Copepoda luciferase	Metridia curticauda	Secreted luciferase	Copepoda	Arthropoda		BAN91826.1	20	Coelenterazine	Takenaka et al., 2013	Markova et al., 2018
Type XI: Copepoda luciferase	Metridia okhotensis	Secreted luciferase	Copepoda	Arthropoda		BAM11214.1/ BAM11213.1	20.5	Coelenterazine	Takenaka et al., 2012	Markova et al., 2018
Type XI: Copepoda luciferase	Metridia asymmetrica	Secreted luciferase	Copepoda	Arthropoda		BAN91824.1	20.2	Coelenterazine	Takenaka et al., 2013	Markova et al., 2018
Type XI: Copepoda luciferase	Metridia lucens	Secreted luciferase	Copepoda	Arthropoda		/	/	Coelenterazine	Tessler et al., 2018	Tessler et al., 2018
Type XI: Copepoda luciferase	Gaussia princeps	Secreted luciferase	Copepoda	Arthropoda		AAG54095.1	19.9	Coelenterazine	Bryan and Sent-Gyorgyi, 1999; Verhaegen and Christopoulos, 2002	Thompson et al., 1997
Type XII: Odontosyllis luciferase	Odontosyllis octodentata	Luciferase 8	Polychaeta	Annelida		BBG43636.1	/	Unknown luciferin	Mitani et al., 2019
Type XII: Odontosyllis luciferase	Odontosyllis octodentata	Luciferase 6	Polychaeta	Annelida		BBG43634.1	/	Unknown luciferin	Mitani et al., 2019
Type XII: Odontosyllis luciferase	Odontosyllis octodentata	Luciferase 4	Polychaeta	Annelida		BBG43632.1	/	Unknown luciferin	Mitani et al., 2019
Type XII: Odontosyllis luciferase	Odontosyllis octodentata	Luciferase 2	Polychaeta	Annelida		BBG43630.1	/	Unknown luciferin	Mitani et al., 2019
Type XII: Odontosyllis luciferase	Odontosyllis octodentata	Luciferase 1	Polychaeta	Annelida		BBG43629.1	/	Unknown luciferin	Mitani et al., 2019
Type XII: Odontosyllis luciferase	Odontosyllis octodentata	Luciferase 3	Polychaeta	Annelida		BBG43631.1	/	Unknown luciferin	Mitani et al., 2019
Type XII: Odontosyllis luciferase	Odontosyllis octodentata	Luciferase 7	Polychaeta	Annelida		BBG43635.1	/	Unknown luciferin	Mitani et al., 2019
Type XII: Odontosyllis luciferase	Odontosyllis octodentata	Luciferase 5	Polychaeta	Annelida		BBG43633.1	/	Unknown luciferin	Mitani et al., 2019
Type XII: Odontosyllis luciferase	Odontosyllis undecimdonta	Luciferase 1	Polychaeta	Annelida		BBG43637.1/AWO77073.1/AWO77074.1	/	Ondotosyllis luciferin	Mitani et al., 2018, 2019; Schultz et al., 2018	Kotlobay et al., 2019
Type XII: Odontosyllis luciferase	Odontosyllis undecimdonta	Luciferase 2	Polychaeta	Annelida		BBG43638.1	/	Ondotosyllis luciferin	Mitani et al., 2018, 2019; Schultz et al., 2018	Kotlobay et al., 2019
Type XII: Odontosyllis luciferase	Odontosyllis undecimdonta	Luciferase 3	Polychaeta	Annelida		BBG43639.1	/	Ondotosyllis luciferin	Mitani et al., 2018, 2019; Schultz et al., 2018	Kotlobay et al., 2019
Type XII: Odontosyllis luciferase	Odontosyllis enopla	Luciferase	Polychaeta	Annelida		/	/	Unknown luciferin	Shimomura et al., 1963	Shimomura et al., 1963
Unknown photoprotein	Odontosyllis phosphorea	Photoprotein	Polychaeta	Annelida		/	/	Unknown luciferin	Deheyn and Latz, 2009	Deheyn and Latz, 2009
Unknown photoprotein	Chaetopterus variopedatus	Photoprotein	Polychaeta	Annelida		/	60	Riboflavin	Shimomura, 2006	Branchini et al., 2014
Unknown photoprotein	Malmgrenia lunulata (Harmothoe lunulata)	Polynoidin	Polychaeta	Annelida		/	65	Unknown luciferin	Nicolas et al., 1982
Unknown photoprotein	Harmothoe areolata	Polynoidin	Polychaeta	Annelida		/	64	Unknown luciferin	Plyuscheva and Martin, 2009
Unknown photoprotein	Harmothoe imbricata	Polynoidin	Polychaeta	Annelida		/	65	Unknown luciferin	Plyuscheva and Martin, 2009
Unknown luciferase	Fridericia heliota	Luciferase	Oligochaeta	Annelida		/	40	Fridericia luciferin	Rodionova et al., 2003; Petushkov et al., 2014	Rodionova et al., 2003; Petushkov et al., 2014
Unknown luciferase	Diplocardia longa	Diplocardia luciferase	Oligochaeta	Annelida		/	300 (71, 45, 14.5)	Diplocardia luciferin (N-isovaleryl-3-aminopropanal)	Ohtsika et al., 1976	Ohtsika et al., 1976
Unknown luciferase	Diplocardia alba	Diplocardia luciferase	Oligochaeta	Annelida		/	/	Diplocardia luciferin (N-isovaleryl-3-aminopropanal)	Wampler and Jamieson, 1980	Wampler and Jamieson, 1980
Unknown luciferase	Diplocardia eigeni	Diplocardia luciferase	Oligochaeta	Annelida		/	/	Diplocardia luciferin (N-isovaleryl-3-aminopropanal)	Wampler and Jamieson, 1980	Wampler and Jamieson, 1980
Unknown luciferase	Diplotrema heteropora	Diplocardia luciferase	Oligochaeta	Annelida		/	/	Diplocardia luciferin (N-isovaleryl-3-aminopropanal)	Wampler and Jamieson, 1980	Wampler and Jamieson, 1980
Unknown luciferase	Fletcherodrilus fasciatus	Diplocardia luciferase	Oligochaeta	Annelida		/	/	Diplocardia luciferin (N-isovaleryl-3-aminopropanal)	Wampler and Jamieson, 1980	Wampler and Jamieson, 1980
Unknown luciferase	Fletcherodrilus unicus	Diplocardia luciferase	Oligochaeta	Annelida		/	/	Diplocardia luciferin (N-isovaleryl-3-aminopropanal)	Wampler and Jamieson, 1980	Wampler and Jamieson, 1980
Unknown luciferase	Pontodrilus bermudensis	Diplocardia luciferase	Oligochaeta	Annelida		/	/	Diplocardia luciferin (N-isovaleryl-3-aminopropanal)	Wampler and Jamieson, 1980	Wampler and Jamieson, 1980
Unknown luciferase	Spenceriella cormieri	Diplocardia luciferase	Oligochaeta	Annelida		/	/	Diplocardia luciferin (N-isovaleryl-3-aminopropanal)	Wampler and Jamieson, 1980	Wampler and Jamieson, 1980
Unknown luciferase	Spenceriella curtisi	Diplocardia luciferase	Oligochaeta	Annelida		/	/	Diplocardia luciferin (N-isovaleryl-3-aminopropanal)	Wampler and Jamieson, 1980	Wampler and Jamieson, 1980
Unknown luciferase	Spenceriella minor	Diplocardia luciferase	Oligochaeta	Annelida		/	/	Diplocardia luciferin (N-isovaleryl-3-aminopropanal)	Wampler and Jamieson, 1980	Wampler and Jamieson, 1980
Unknown luciferase	Spenceriella noctiluca	Diplocardia luciferase	Oligochaeta	Annelida		/	/	Diplocardia luciferin (N-isovaleryl-3-aminopropanal)	Wampler and Jamieson, 1980	Wampler and Jamieson, 1980
Unknown luciferase	Microscolex phosphoreus	Diplocardia luciferase	Oligochaeta	Annelida		/	/	Diplocardia luciferin (N-isovaleryl-3-aminopropanal)	Wampler, 1982	Wampler, 1982
Unknown luciferase	Eisenia lucens	?	Oligochaeta	Annelida		/	/	Riboflavin/aldehyde		Pes et al., 2016
Unknown luciferase	Octochaetus multiporus	Diplocardia luciferase	Oligochaeta	Annelida		/	/	Diplocardia luciferin (N-isovaleryl-3-aminopropanal)	Wampler and Jamieson, 1980	Wampler and Jamieson, 1980
Unknown luciferase	Orfelia fultoni	Luciferase	Insecta	Arthropoda		/	/	Keroplatin	Viviani et al., 2002	Viviani et al., 2002, 2020
Unknown luciferase	Neoceroplatus betaryensis	Luciferase	Insecta	Arthropoda		/	/	Keroplatin		Falaschi et al., 2019
Unknown photoprotein	Luminodesmus sequoia	Photoprotein	Diplopoda	Myriapoda		/	104	Porphyrin	Shimomura, 1984	Shimomura, 1984, 2008
Unknown luciferase	Latia neritoides	Latia luciferase	Gastropoda	Mollusca		/	173 (6 X 31.6)	Latia luciferin	Shimomura and Johnson, 1968; Shimomura et al., 1972	Shimomura and Johnson, 1968; Shimomura et al., 1972
Unknown luciferase	Periphylla periphylla	Luciferase L/A, B, C	Anthozoa	Cnidaria		/	32 (L), 20 (A), 40 (B), 80 (C)	Coelenterazine	Shimomura and Flood, 1998; Shimomura et al., 2001	Shimomura and Flood, 1998; Shimomura et al., 2001
Unknown	Isidella tentaculum	Unknown	Anthozoa	Cnidaria		/	/	Coelenterazine	/	Bessho-Uehara et al., 2020a
Unknown	Heteropolypus ritteri	Unknown	Anthozoa	Cnidaria		/	/	Coelenterazine	/	Bessho-Uehara et al., 2020a
Unknown	Paragorgia arborea	Unknown	Anthozoa	Cnidaria		/	/	Coelenterazine	/	Bessho-Uehara et al., 2020a
Unknown	Distichoptilum gracile	Unknown	Anthozoa	Cnidaria		/	/	Coelenterazine	/	Bessho-Uehara et al., 2020a
Unknown	Cavernularia obesa	Unknown	Anthozoa	Cnidaria		/	/	Coelenterazine	/	Shimomura and Johnson, 1979
Unknown	Ptilosarcus gurneyi	Unknown	Anthozoa	Cnidaria		/	/	Coelenterazine	/	Shimomura and Johnson, 1979
Unknown	Euaugaptilus magnus	Unknown	Copepoda, Crustacea	Arthropoda		/	/	Coelenterazine	/	Campbell and Herring, 1990
Unknown	Conchoecia pseudodiscophora	Unknown	Ostracoda, Crustacea	Arthropoda		/	/	Coelenterazine	/	Oba et al., 2004
Unknown	Gnathophausia longispina	Unknown	Lophogastrida, Crustacea	Arthropoda		/	/	Coelenterazine	/
Unknown	Gnathophausia ingens	Unknown	Lophogastrida, Crustacea	Arthropoda		/	/	Coelenterazine	/	Frank et al., 1984
Unknown	Meganyctiphanes norvegica	Unknown	Euphausiacea, Crustacea	Arthropoda		/	/	Dinoflagellate luciferin	/	Dunlap et al., 1980
Unknown	Euphausia superba	Unknown	Euphausiacea, Crustacea	Arthropoda		/	/	Dinoflagellate luciferin	/
Unknown	Euphausia pacifica	Unknown	Euphausiacea, Crustacea	Arthropoda		/	/	Dinoflagellate luciferin	/	Shimomura, 2006
Unknown	Systellaspis debilis	Unknown	Decapoda, Crustacea	Arthropoda		/	/	Coelenterazine	/	Thompson et al., 1995b
Unknown	Systellapsis lanceocaudata	Unknown	Decapoda, Crustacea	Arthropoda		/	/	Coelenterazine	/
Unknown	Heterocarpus laevigatus	Unknown	Decapoda, Crustacea	Arthropoda		/	/	Coelenterazine	/	Inoue et al., 1976b
Unknown	Acanthephyra purpurea	Unknown	Decapoda, Crustacea	Arthropoda		/	/	Coelenterazine	/	Thompson et al., 1995a
Unknown	Sergestes lucens	Unknown	Decapoda, Crustacea	Arthropoda		/	/	Coelenterazine	/	Thompson et al., 1995a
Unknown	Sergestes prehensilis	Unknown	Decapoda, Crustacea	Arthropoda		/	/	Coelenterazine	/	Thompson et al., 1995a
Unknown	Onychoteuthis borealijaponicus	Unknown	Cephalopoda	Mollusca		/	/	Coelenterazine	/	Shimomura et al., 1980
Unknown	Pyroteuthis margaritifera	Unknown	Cephalopoda	Mollusca		/	/	Coelenterazine	/
Unknown	Pyroteuthis addolux	Unknown	Cephalopoda	Mollusca		/	/	Coelenterazine	/
Unknown photoprotein	Ophiopsyla californica	Ophiopsilin	Ophiuroidea	Echinodermata		/	45	Riboflavin/ferritin	Shimomura, 1986	Rawat and Deheyn, 2016
Unknown luciferase	Balanoglossus biminiensis	Luciferase	Enteropneusta	Hemichordata		/	/	Unknown luciferin	Cormier and Dure, 1963	Cormier and Dure, 1963
Unknown luciferase	Ptychodera flava	Luciferase	Enteropneusta	Hemichordata		/	/	Riboflavin/Tetrabromohydroquinone	Kanakubo et al., 2005	Kanakubo et al., 2005
Unknown luciferase	Benthosema pterotum	BP luciferase	Teleostei	Vertebrata		/	/	Coelenterazine	Homaei et al., 2013	Homaei et al., 2013
Unknown	Argyropelecus hemigymnus	Unknown	Teleostei	Vertebrata		/	/	Coelenterazine	/	Mallefet and Shimomura, 1995
Unknown	Chauliodus sloani	Unknown	Teleostei	Vertebrata		/	/	Coelenterazine	/	Mallefet and Shimomura, 1995
Unknown	Myctophum punstatum	Unknown	Teleostei	Vertebrata		/	/	Coelenterazine	/	Mallefet and Shimomura, 1995
Unknown	Clyclothone braueri	Unknown	Teleostei	Vertebrata		/	/	Coelenterazine	/	Mallefet and Shimomura, 1995
Unknown	Electrona antarctica	Unknown	Teleostei	Vertebrata		/	/	Coelenterazine	/	Duchatelet et al., 2019
Unknown	Gymnoscopelus braueri	Unknown	Teleostei	Vertebrata		/	/	Coelenterazine	/	Duchatelet et al., 2019
Unknown	Krefftichthys anderssonni	Unknown	Teleostei	Vertebrata		/	/	Coelenterazine	/	Duchatelet et al., 2019
Unknown	Protomyctophum bolini	Unknown	Teleostei	Vertebrata		/	/	Coelenterazine	/	Duchatelet et al., 2019
Unknown	Protomyctophum tenisoni	Unknown	Teleostei	Vertebrata		/	/	Coelenterazine	/	Duchatelet et al., 2019
Unknown	Vincinguerria attenuata	Unknown	Teleostei	Vertebrata		/	/	Coelenterazine	/	Rees et al., 1990; Mallefet and Shimomura, 1995
Unknown	Diaphus elucens	Unknown	Teleostei	Vertebrata		/	/	Coelenterazine	/	Inoue et al., 1979
Unknown	Neoscopelus microchir	Unknown	Teleostei	Vertebrata		/	/	Coelenterazine	/	Inoue et al., 1977

## Sheet: Feuil1
References associated with the Supplementary Table S1
Aghamaali, M.R., Jafarian, V., Sariri, R., Molakarimi, M., Rasti, B., Taghdir, M., Sajedi, R.H. and Hosseinkhani, S. (2011). Cloning, sequencing, expression and structural investigation of mnemiopsin from Mnemiopsis leidyi: an attempt toward understanding Ca2+-regulated photoproteins. Protein J. 30(8), 566-574. https://doi.org/10.1007/s10930-011-9363-8
Alipour, B.S., Hosseinkhani, S., Nikkhah, M., Naderi-Manesh, H., Chaichi, M.J. and Osaloo, S.K. (2004). Molecular cloning, sequence analysis, and expression of a cDNA encoding the luciferase from the glow-worm, Lampyris turkestanicus. Biochem. Biophys. Res. Commun. 325(1), 215-222. https://doi.org/10.1016/j.bbrc.2004.10.022
Amaral, D.T., Prado, R.A. and Viviani, V.R. (2012). Luciferase from Fulgeochlizus bruchi (Coleoptera: Elateridae), a Brazilian click-beetle with a single abdominal lantern: molecular evolution, biological function and comparison with other click-beetle luciferases. Photochem. Photobiol. Sci. 11(7), 1259-1267. https://doi.org/10.1039/C2PP25037C
Ast, J.C. and Dunlap, P.V. (2004). Phylogenetic analysis of the lux operon distinguishes two evolutionarily distinct clades of Photobacterium leiognathi. Arch. Microbiol. 181, 352-361. https://doi.org/10.1007/s00203-004-0663-7
Ast, J.C. and Dunlap, P.V. (2005). Phylogenetic resolution and habitat specificity of members of the Photobacterium phosphoreum species group. Environ. Microbiol. 7(10), 1641-1654. https://doi.org/10.1111/j.1462-2920.2005.00859.x
Ast, J.C., Cleenwerck, I., Engelbeen, K., Urbanczyk, H., Thompson, F.L., De Vos, P. and Dunlap, P.V. (2007). Photobacterium kishitanii sp. nov., a luminous marine bacterium symbiotic with deep-sea fishes. Int. J. Syst. Evol. Microbiol. 57(9), 2073-2078. https://doi.org/10.1099/ijs.0.65153-0
Baker, A., Robbins, I., Moline, M.A. and Iglesias-Rodríguez, M.D. (2008). Oligonucleotide primers for the detection of bioluminescent dinoflagellates reveal novel luciferase sequences and information on the molecular evolution of this gene. J. Phycol. 44(2), 419-28. https://doi.org/10.1111/j.1529-8817.2008.00474.x
Bessho-Uehara, M., Konishi, K. and Oba, Y. (2017). Biochemical characteristics and gene expression profiles of two paralogous luciferases from the Japanese firefly Pyrocoelia atripennis (Coleoptera, Lampyridae, Lampyrinae): insight into the evolution of firefly luciferase genes. Photochem. Photobiol. Sci. 16(8), 1301-1310. https://doi.org/10.1039/C7PP00110J
Bessho-Uehara, M. and Oba, Y. (2017). Identification and characterization of the Luc2-type luciferase in the Japanese firefly, Luciola parvula, involved in a dim luminescence in immobile stages. Luminescence. 32(6), 924-931. https://doi.org/10.1002/bio.3273
Bessho-Uehara, M., Francis, W.R. and Haddock, S.H.D. (2020a). Biochemical characterization of diverse deep-sea anthozoan bioluminescence system. Mar. Biol. 167, 114. https://doi.org/10.1007/s00227-020-03706-w
Bessho-Uehara, M., Huang, W., Patry, W.L., Browne, W.E., Weng, J.-K. and Haddock, S.H.D. (2020b). Evidence for de novo biosynthesis of the luminous substrate coelenterazine in ctenophores. iScience. 23(12), 101859. https://doi.org/10.1016/j.isci.2020.101859
Bessho-Uehara, M., Yamamoto, N., Shigenobu, S., Mori, H., Kuwata, K. and Oba, Y. (2020c). Kleptoprotein bioluminescence: Paraprianthus fish obtain luciferase from ostracod prey. Sci. Adv. 6(2), eaax4942. https://doi.org/10.1126/sciadv.aax4942
Bitler, B. and McElroy, W.D. (1957). The preparation and properties of crystalline firefly luciferin. Arch. Biochem. Biophys. 72, 358-368. https://doi.org/10.1016/0003-9861(57)90212-6
Borisova, V.V., Frank, L.A., Markova, S.V., Burakova, L.P. and Vysotski, E.S. (2008). Recombinant Metridia luciferase isoforms: expression, refolding and applicability for in vitro assay. Photochem. Photobiol. Sci. 7(9), 1025-1031. https://doi.org/10.1039/B807271J
Branchini, B.R., Southworth, T.L., DeAngelis, J.P., Roda, A. and Michelini, E. (2006). Luciferase from the Italian firefly Luciola italica: molecular cloning and expression. Comp. Biochem. Physiol. B, Biochem. Mol. Biol. 145(2), 159-167. https://doi.org/10.1016/j.cbpb.2006.06.001
Branchini, B.R., Behney, C.E., Southworth, T.L., Rawat, R. and Deheyn, D.D. (2014). Chemical analysis of the luminous slime secreted by the marine worm Chaetopterus (Annelida, Polychaeta). Photochem. Photobiol. 90, 247–251. https://doi.org/10.1111/php.12169
Branchini, B.R., Southworth, T.L., Fontaine, D.M., Murtiashaw, M.H., McGurk, A., Talukder, M.H., Qureshi, R., Yetil, D., Sundlov, J.A. and Gulick, A.M. (2016a). Cloning of the orange light-producing luciferase from Photinus scintillans – A new proposal on how bioluminescence color is determined. Photochem. Photobiol. 93(2), 479-485. https://doi.org/10.1111/php.12671
Branchini, B.R., Southworth, T.L., Salituro, L.J., Fontaine, D.M. and Oba, Y. (2016b). Cloning of the blue ghost (Phausis reticulata) luciferase reveals a glowing source of green light. Photochem. Photobiol. 93(2), 473-478. https://doi.org/10.1111/php.12649
Bryan, B.J. and Sent-Gyorgyi, C.S. (1999). Luciferases, fluorescent proteins, nucleic acids encoding the luciferases and fluorescent proteins and the use thereof in diagnostics, high throughput screening and novelty items. International Pub. No. WO 99/49019
Burakova, L.P., Natashin, P.V., Markova, S.V., Eremeeva, E.V., Malikova, N.P., Cheng, C., Liu, Z.-J. and Vysotski, E.S. (2016). Mitrocomin from the jellyfish Mitrocoma cellularia with deleted C-terminal tyrosine reveals a higher bioluminescence activity compared to wild type photoprotein. J. Photochem. Photobiol. B. 162, 286-297. https://doi.org/10.1016/j.jphotobiol.2016.06.054
Campbell, A.K. and Herring, P.J. (1990). Imidazolopyrazine bioluminescence in copepods and other marine organisms. Mar. Biol. 104, 219-225. https://doi.org/10.1007/BF01313261
Carrasco-Lopez, C., Ferreira, J., Lui, N.M., Schramm, S., Berraud-Pache, R., Navizet, I., Panjikar, S., Naumov, P. and Rabeh, W.M. (2018). Beetle luciferases with naturally red- and blue-shifted emission. Life Sci. Alliance. 1(4). https://doi.org/10.26508/lsa.201800072
Choi, Y.S., Lee, K.S., Bae, J.S., Lee, K.M., Kim, S.R., Kim, I., Lee, S.M., Sohn, H.D. and Jin, B.R. (2002). Molecular cloning and expression of a cDNA encoding the luciferase from the firefly, Hoturia unmunsana. Comp. Biochem. Physiol. B, Biochem. Mol. Biol. 132(3), 661-670. https://doi.org/10.1016/S1096-4959(02)00085-4
Choi, Y.S., Bae, J.S., Lee, K.S., Kim, S.R., Kim, I., Kim, J.G., Kim, K.Y., Kim, S.E., Suzuki, H., Lee, S.M., Sohn, H.D. and Jin, B.R. (2003). Genomic structure of the luciferase gene and phylogenetic analysis in the Hoturia-group fireflies. Comp. Biochem. Physiol. B, Biochem. Mol. Biol. 134(2), 199-214. https://doi.org/10.1016/S1096-4959(02)00249-X
Cohn, D.H., Mileham, A.J., Simon, M.I., Nealson, K.H., Rausch, S.K., Bonam, D. and Baldwin, T.O. (1985). Nucleotide sequence of the luxA gene of Vibrio harveyi and the complete amino acid sequence of the alpha subunit of bacterial luciferase. J. Biol. Chem. 260, 6139-6146.
Cormier, M.J. and Dure, L.S. (1963). Studies on the bioluminescence of Balanoglossus biminiensis extract I. Requirement for hydrogen peroxide and characteristics of the system. J. Biol. Chem. 238, 785–789.
Day, J.C., Chaichi, M.J., Najafil, I. and Whiteley, A.S. (2006). Genomic structure of the luciferase gene from the bioluminescent beetle, Nyctophila cf. caucasia. J. Insect Sci. 6(1), 37. https://doi.org/10.1673/031.006.3701
Day, J.C., Goodall, T.I. and Bailey, M.J. (2009). The evolution of the adenylate-forming protein family in beetles: multiple luciferase gene paralogues in fireflies and glow-worms. Mol. Phylogenetics Evol. 50(1), 93-101. https://doi.org/10.1016/j.ympev.2008.09.026
de Wet J.R., Wood, K.V., Helinski, D.R. and DeLuca, M. (1985). Cloning of firefly luciferase cDNA and the expression of active luciferase in Escherichia coli. Proc. Natl. Acad. Sci. U. S. A. 82(23), 7870-7873. https://doi.org/10.1073/pnas.82.23.7870
de Wet J.R., Wood, K.V., DeLuca, M., Helinski, D.R. and Subramani, S. (1987). Firefly luciferase gene: structure and expression in mammalian cells. Mol. Cell. Biol. 7(2), 725-737. https://doi.org/10.1128/MCB.7.2.725
Deheyn, D.D. and Latz, MI. (2009). Internal and secreted bioluminescence of the marine polychaete Odontosyllis phosphorea (Syllidae). Invertebr. Biol. 128, 31-45. https://doi.org/10.1111/j.1744-7410.2008.00149.x
Delroisse, J., Ullrich-Lüter, E., Blaue, S., Ortega-Martinez, O., Eeckhaut, I., Flammang, P. and Mallefet, J. (2017). A puzzling homology: a brittle star using a putative cnidarian-type luciferase for bioluminescence. Open Biol. 7(4), 160300. https://doi.org/10.1098/rsob.160300
Deng, L., Vysotski, E.S., Markova, S.V., Liu, Z.-J., Lee, J., Rose, J. and Wang, B.-C. (2009). All three Ca2+-binding loops of photoproteins bind calcium ions: the crystal structures of calcium-loaded apo-aequorin and apo-obelin. Protein Sci. 14(3), 663-675. https://doi.org/10.1110/ps.041142905
Devine, J.H., Kutuzova, G.D., Green, V.A., Ugarova, N.N. and Baldwin, T.O. (1993). Luciferase from the East European firefly Luciola mingrelica: cloning and nucleotide sequence of the cDNA, overexpression in Escherichia coli and purification of the enzyme. BBA-Gene Struct. Expr. 1173(2), 121-132. https://doi.org/10.1016/0167-4781(93)90172-A
Dong, P.-X., Hou, Q.-B., Li, X.-Y. and Liang, X.-C. (2008). Cloning, expression and sequence analysis of a luciferase gene from the Chinese firefly Pyrocoelia pygidialis. Zool. Res. 29(5), 477-484.
Duchatelet, L., Hermans, C., Duhamel, G., Cherel, Y. and Mallefet, J. (2019). Coelenterazine detection in five myctophid species from the Kerguelen Plateau. D. Welsford, J. Dell, G. Duhamel (Eds.), The Kerguelen Plateau: Marine Ecosystem and Fisheries. Proceedings of the Second Symposium, Australian Antartic Division, Kingston (2019), pp. 31-41
Dunlap, J.C., Hastings, J.W. and Shimomura, O. (1980). Crossreactivity between the light-emitting systems of distantly related organisms: novel type of light-emitting compound. Proc. Natl. Acad. Sci. U. S. A. 77(3), 1394-1397. https://doi.org/10.1073/pnas.77.3.1394
Dunlap, J.C. and Hastings, J.W. (1981). Biochemistry of dinoflagellate bioluminescence: the purification and characterization of dinoflagellate luciferin from Pyrocystis lunula. Biochemistry. 20(4), 983-989. https://doi.org/10.1021/bi00507a052
Dunlap, J.C., Hastings, J.W. and Shimomura, O. (1981). Dinoflagellate luciferin is structurally related to chlorophyll. FEBS Lett. 135(2), 273-276. https://doi.org/10.1016/0014-5793(81)80799-5
Dunlap, P.V. and Kita-Tsukamoto, K. (2006). Luminous bacteria. Prokaryotes. 2, 863-892. https://doi.org/10.1007/0-387-30742-7_27
Dunstan, S.L., Sala-Newby, G.B., Fajardo, A.B., Taylor, K.M. and Campbell, A.K. (2000). Cloning and expression of the bioluminescent photoprotein pholasin from the bivalve mollusk Pholas dactylus. J. Biol. Chem. 275, 9403-9409. https://doi.org/10.1074/jbc.275.13.9403
Emamzadeh, A.R., Hosseinkhani, S., Sadeghizadeh, M., Nikkhah, M., Chaichi, M.J. and Mortazavi, M. (2006). cDNA cloning, expression and homology modeling of a luciferase from the firefly Lampyroidea maculata. J. Biochem. Mol. Biol. 39(5), 578-585. https://doi.org/10.5483/bmbrep.2006.39.5.578
Fagan, T.F., Ohmiya, Y., Blinks, J.R., Inouye, S. and Tsuji, F.I. (1993). Cloning, expression and sequence analysis of cDNA for the Ca2+-binding photoprotein, mitrocomin. FEBS lett. 333(3), 301-305. https://doi.org/10.1016/0014-5793(93)80675-K
Fajardo, C., De Donato, M., Rodulfp, H., Martinez-Rodriguez, G., Costas, B., Mancera, J.M. and Fernandez-Acero, F.J. (2020). New perspectives related to the bioluminescent system in dinoflagellates: Pyrocystis lunula, a case study. Int. J. Mol. Sci. 21(5), 1784 https://doi.org/10.3390/ijms21051784
Falaschi, R.L., Amaral, D.T., Santos, I., Domingos, A.H.R., Johnson, G.A., Martins, A.G.S., Viroomal, I.B., Pompéia, S.L., Mirza, J.D., Oliveira, A.G., Bechara, E.J.H., Viviani, V.R. and Stevani, C.V. (2019). Neoceroplatus betaryiensis nov. sp. (Diptera: Keroplatidae) is the first record of bioluminescent fungus-gnat in South America. Sci. Rep. 9, 11291. https://doi.org/10.1038/s41598-019-47753-w
Fourrage, C., Swann, K., Gonzalez Garcia, J.R., Campbell, A.K. and Houliston, E. (2014). An endogenous green fluorescent protein–photoprotein pair in Clytia hemisphaerica eggs shows co-targeting to mitochondria and efficient bioluminescence energy transfer. Open Biol. 4(4), 130206. https://doi.org/10.1098/rsob.130206
Francis, W.R., Christianson, L.M. and Haddock, S.H.D. (2017). Symplectin evolved from multiple duplications in bioluminescent squid. PeerJ. 5, e3633. https://doi.org/10.7717/peerj.3633
Frank, T.M., Widder, E.A., Latz, M.I. and Case, J.F. (1984). Dietary maintenance of bioluminescence in a deep-sea mysid. J. Exp. Biol. 109, 385-389.
Fujii, T., Ahn, J.-Y., Kuse, M., Mori, H., Matsuda, T. and Isobe, M. (2002). A novel photoprotein from oceanic squid (Symplectoteuthis oualaniensis) with sequence similarity to mammalian carbon-nitrogen hydrolase domains. Biochem. Biophys. Res. Commun. 293(2), 874-879. https://doi.org/10.1016/S0006-291X(02)00296-6
Galeazzo, G.A., Mirza, J.D., Dorr, F.A., Pinto, E., Stevani, C.V., Lohrmann, K.B. and Oliveira, A.G. (2019). Characterizing the bioluminescence of the Humboldt squid, Dosidicus gigas (d’Orbigny, 1835): One of the largest luminescent animals in the world. Photochem. Photobiol. 95(5), 1179-1185. https://doi.org/10.1111/php.13106
Gimenez, G., Metcalf, P., Paterson, N.G. and Sharpe, M.L. (2016). Mass spectrometry analysis and transcriptome sequencing reveal glowing squid crystal proteins are in the same superfamily as firefly luciferase. Sci. Rep. 6, 27638. https://doi.org/10.1038/srep27638
Green, A.A. and McElroy, W.D. (1956). Crystalline firefly luciferase. BBA. 20, 170-176. https://doi.org/10.1016/0006-3002(56)90275-X
Gurskaya, N.G., Fradkov, A.F., Pounkova, N.I., Staroverov, D.B., Bulina, M.E., Yanushevich, Y.G., Labas, Y.A., Lukyanov, S. and Lukyanov, K.A. (2003). A colourless green fluorescent protein homologue from the non-fluorescent hydromedusa Aequorea coerulescens and its fluorescent mutants. Biochem. J. 373(2), 403-408. https://doi.org/10.1042/bj20021966
Haddock, S.H.D., Rivers, T.J. and Robison, B.H. (2001). Can coelenterates make coelenterazine? Dietary requirement for luciferin in cnidarian bioluminescence. Proc. Natl. Acad. Sci. U. S. A. 98(20), 11148-11151. https://doi.org/10.1073/pnas.201329798
Hendry, T.A., de Wet, J.R. and Dunlap, P.V. (2013). Genomic signatures of obligate host dependence in the luminous bacterial symbiont of a vertebrate. Environ. Microbiol. 16(8), 2611-2622. https://doi.org/10.1111/1462-2920.12302
Hendry, T.A. and Dunlap, P.V. (2014). Phylogenetic divergence between the obligate luminous symbionts of flashlight fishes demonstrates specificity of bacteria to host genera. Environ. Microbiol. Rep. 6(4), 331-338. https://doi.org/10.1111/1758-2229.12135
Hendry, T.A., Freed, L.L., Fader, D., Fenolio, D., Sutton, T.T. and Lopez, J.V. (2018). Ongoing transposon-mediated genome reduction in the luminous bacterial symbionts of deep-sea Ceratioid anglerfishes. mBio. 9, 3. https://doi.org/10.1128/mBio.01033-18
Homaei, A.A., Mymandi, A.B., Sariri, R., Kamrani, E., Stevanato, R., Etezad, S.-M. and Khajed, K. (2013). Purification and characterization of a novel thermostable luciferase from Benthosema pterotum. J. Photochem. Photobiol. B. 125, 131-136. https://doi.org/10.1016/j.jphotobiol.2013.05.015
Hori, K., Charbonneau, H., Hart, R.C. and Cormier, MJ. (1977). Structure of native Renilla reniformis luciferin. Proc. Natl Acad. Sci. U. S. A. 74(10), 4285-4287. https://doi.org/10.1073/pnas.74.10.4285
Illarionov, B.A., Protopopova, M.V., Karginov, V.A., Mertvetsov, N.P. and Gitelson, J.I. (1988). Nucleotide sequence of part of Photobacterium leiognathid lux operon. Nucleic Acids Res. 16(20), 9855. https://doi.org/10.1093/nar/16.20.9855
Illarionov, B.A., Bondar, V.S., Illarionova, V.A. and Vysotski, E.S. (1995). Sequence of the cDNA encoding the Ca2+-activated photoprotein obelin from the hydroid polyp Obelia longissima. Gene. 153(2), 273-274. https://doi.org/10.1016/0378-1119(94)00797-V
Inoue, S., Kakoi, H. and Goto, T. (1976a). Squid bioluminescence III. Isolation and structure of Watasenia luciferin. Tetrahedron Lett. 17(34), 2971-2974. https://doi.org/10.1016/S0040-4039(01)85503-9
Inoue, S., Kakoi, H. and Goto, T. (1976b). Oplophorus luciferin, bioluminescent substance of the decapod shrimps, Oplophorus spinosus and Heterocarpus laevigatus. J. Chem. Soc., Chem. Commun. 24, 1056-1057. https://doi.org/10.1039/C39760001056
Inoue, S., Okada, K., Kakoi, H. and Goto, T. (1977). Fish bioluminescence I. Isolation of a luminescent substance from a Myctophina fish, Neoscopelus microchir, and identification of it as Oplophorus luciferin. Chem. Lett. 6(3), 257-258. https://doi.org/10.1246/cl.1977.257
Inoue, S., Kakoi, H., Okada, K. and Goto, T. (1979). Fish bioluminescence II. Trace characterization of the luminescence system of a Myctophina fish, Diaphus elucens. Chem. Lett. 8(3), 253-256. https://doi.org/10.1246/cl.1979.253
Inouye, S., Noguchi, M., Sakaki, Y., Takagi, Y., Miyata, T., Iwanaga, S., Miyata, T. and Fujii, F.I. (1985). Cloning and sequence analysis of cDNA for the luminescent protein aequorin. Proc. Natl. Acad. Sci. U. S. A. 82(10), 3154-3158. https://doi.org/10.1073/pnas.82.10.3154
Inouye, S., Watanabe, K., Nakamura, H. and Shimomura, O. (2000). Secretional luciferase of the luminous shrimp Oplophorus gracilirostris: cDNA cloning of a novel imidazopyrazinone luciferase. FEBS Lett. 481(1), 19-25. https://doi.org/10.1016/S0014-5793(00)01963-3
Inouye, S. (2008). Cloning, expression, purification and characterization of an isotype of clytin, a calcium-binding photoprotein from the luminous hydromedusa Clytia gregarium. J. Biochem. 143(5), 711-717. https://doi.org/10.1093/jb/mvn024
Ishida, Y., Meyer-Rochow, V.B. and Asano, Y. (2018). Comparison of DNA sequence encoding hydroxynitrile lyase from the invasive millipede, Chamberlinius hualienensis, collected at Kagoshima, Shizuoka, and Hachijojima, Tokyo. Bull. Toyama Pref. Univ. 28, 35-40
Isobe, M., Fujii, T., Kuse, M., Miyamoto, K. and Koga, K. (2002). 19F-dehydrocoelenterazine as probe to investigate the active site of symplectin. Tetrahedron. 58(11), 2117-2126. https://doi.org/10.1016/S0040-4020(02)00100-X
Jafarian, V., Sariri, R., Hosseinkhani, S., Aghamaali, M.R., Sajedi, R.H., Taghdir, M. and Hassannia, S. (2011). A unique EF-hand motif in mnemiopsin photoprotein from Mnemiopsis leidyi: Implication for its low calcium sensitivity. Biochem. Biophys. Res. Commun. 413(2), 164-170. https://doi.org/10.1016/j.bbrc.2011.08.022
Johnson, F.H., Sugiyama, N., Shimomura, O., Saiga, Y. and Haneda, Y. (1961). Crystalline luciferin from a luminescent fish, Parapriacanthus beryciformes. Proc. Natl. Acad. Sci. U. S. A. 47(4), 486-489. https://doi.org/10.1073/pnas.47.4.486
Kanakubo, A., Koga, K., Isobe, M. and Yoza, K. (2005). Tetrabromohydroquinone and riboflavin are possibly responsible for green luminescence in the luminous acorn worm, Ptychodera flava. Luminescence. 20, 397-400. https://doi.org/10.1002/bio.803
Ke, H.-M., Lee, H.-H., Lin, C.-Y.I., Liu, M.R., Hsieh, J.-W.A., Chang, C.-C., Wu, P.-H., et al. (2020). Mycena genomes resolve the evolution of fungal bioluminescence. BioRxiv. https://doi.org/10.1101/2020.05.06.079921
Khrulnova, S.A., Manukhov, I.V., Zarubina, A.P. and Zavilgelsky, G.B. (2010). Aliivibrio logei KCh1 (Kamchatka isolate): biochemical and bioluminescence characteristics and cloning of the lux operon. Microbiol. 79, 349-355. https://doi.org/10.1134/S0026261710030112
Kim, J.G., Choi, Y.S., Kim, K.Y., Bae, J.S., Kim, I., Sohn, H.D. and Jin, B.R. (2004). Genomic structure and phylogenetic analysis of the luciferase gene of the firefly, Luciola lateralis (Coleoptera: Lampyridae). Eur. J. Entomol. 101, 1-11.
Kishi, T., Goto, T., Hirata, Y., Shimomura, O. and Johnson, F.H. (1966). Cypridina bioluminescence I structure of Cypridina luciferin. Tetrahedron Lett. 7(29), 3427-3436. https://doi.org/10.1016/S0040-4039(01)82806-9
Kishi, Y., Matsuura, S., Inoue, S., Shimomura, O. and Goto, T. (1968). Luciferin and luciopterin isolated from the Japanese firefly, Luciola cruciate. Tetrahedron Lett. 9(24), 2847-2850. https://doi.org/10.1016/S0040-4039(00)75644-9
Kotlobay, A.A., Sarkisyan, K.S., Mokrushina, Y.A., Marcet-Houben, M., Serebrovskaya, E.O., Markina, N.M., et al. (2018). Genetically encodable bioluminescent system from fungi. Proc. Natl. Acad. Sci. U. S. A. 115(50), 12728-12732. https://doi.org/10.1073/pnas.1803615115
Kotlobay, A.A., Dubinnyi, M.A., Purtov, K.V., et al. Bioluminescence chemistry of fireworm Odontosyllis. Proc. Natl. Acad. Sci. U. S. A. 116(38), 18911–18916. https://doi.org/10.1073/pnas.1902095116
Kuse, M., Tanaka, E. and Nishikawa, T. (2008). Pholasin luminescence is enhanced by addition of dehydrocoelenterazine. Bioorg. Med. Chem. Lett. 18(20), 5657-5659. https://doi.org/10.1016/j.bmcl.2008.08.113
Kuse, M. (2020). Marine bioluminescence with dehydrocoelenterazine, an imidazopyrazinone Compound. In: Topics in Heterocyclic Chemistry. Springer, Berlin, Heidelberg. https://doi.org/10.1007/7081_2020_41
Lee, K.S., Park, H.J., Bae, J.S., Goo, T.W., Kim, I., Sohn, H.D. and Jin, B.R. (2001). Molecular cloning and expression of a cDNA encoding the luciferase from the firefly, Pyrocoelia rufa. J. Biotechnol. 92(1), 9-19. https://doi.org/10.1016/S0168-1656(01)00323-6
Li, L., Hong, R. and Hastings, J.W. (1997). Three functional luciferase domains in a single polypeptide chain. Proc. Natl. Acad. Sci. U. S. A. 94(17), 8954-8958. https://doi.org/10.1073/pnas.94.17.8954
Li, X., Yang, S. and Liang, X. (2006). Phylogenetic relationship of the firefly, Diaphanes pectinealis (Insecta, Coleoptera, Lampyridae) based on DNA sequence and gene structure of luciferase. Zool. Res. 27(4), 367-374.
Li, X., Ogoh, K., Ohba, N., Liang, X. and Ohmiya, Y. (2007). Mitochondrial genomes of two luminous beetles, Rhagophthalmus lufengensis and R. ohbai (Arthropoda, Insecta, Coleoptera). Gene. 392(1-2), 196-205. https://doi.org/10.1016/j.gene.2006.12.017
Liu, G.-C., Dong, Z.-W., Hou, Q.-B., He, J.-W., Zhao, R.-P., Wang, W. and Li, X.-Y. (2019a). Second Rhagophthalmid luciferase cloned from Chinese glow-worm Menghuoius giganteus (Rhagophthalmidae: Elateroidea). Photochem. Photobiol. 96(1), 46-54. https://doi.org/10.1111/php.13172
Liu, G.-C., Zhang, R., Hou, Q.-B., He, J.-W., Dong, Z.-W., Zhao, R.-P., Wang, W. and Li, X.-Y. (2019b). Cloning and characterization of luciferase from the Chinese firefly Lamprigera yunnana. Photochem. Photobiol. 95(5), 1186-1194. https://doi.org/10.1111/php.13109
Liu, L., Wilson, T. and Hastings, J.W. (2004). Molecular evolution of dinoflagellate luciferases, enzymes with three catalytic domains in a single polypeptide. Proc. Natl. Acad. Sci. U. S. A. 101(47), 16555-16560. https://doi.org/10.1073/pnas.0407597101
Liu, L. and Hastings, J.W. (2007). Two different domains of the luciferase gene in the heterotrophic dinoflagellate Noctiluca scintillans occur as two separate genes in photosynthetic species. Proc. Natl. Acad. Sci. U. S. A. 104(3), 696-701. https://doi.org/10.1073/pnas.0607816103
Liu, Z.J., Vysotski, E.S., Deng, L., Lee, J., Rose, J. and Wang, B.-C. (2003). Atomic resolution structure of obelin: soaking with calcium enhances electron density of the second oxygen atom substituted at the C2-position of coelenterazine. Biochem. Biophys. Res. Commun. 311(2), 433-439. https://doi.org/10.1016/j.bbrc.2003.09.231
Liu, Z.J., Stepanyuk, G.A., Vysotski, E.S., Lee, J., Markova, S.V., Malikova, N.P. and Wang, B.C. (2006). Crystal structure of obelin after Ca2+-triggered bioluminescence suggests neutral coelenteramide as the primary excited state. Proc. Natl. Acad. Sci. U. S. A. 103, 2570-2575. https://doi.org/10.1073/pnas.0511142103
Lorenz, W.W., McCann, R.O., Longiaru, M. and Cormier, M.J. (1991). Isolation and expression of a cDNA encoding Renilla reniformis luciferase. Proc. Natl. Acad. Sci. U. S. A. 88(10), 4438-4442. https://doi.org/10.1073/pnas.88.10.4438
Malikova, N.P., Visser, N.V., van Hoek, A., Skakun, V.V., Vysotski, E.S., Lee, J. and Visser, A.J.W.G. (2011). Green-fluorescent protein from the bioluminescent jellyfish Clytia gregaria is an obligate dimer and does not form a stable complex with the Ca2+-discharged photoprotein clytin. Biochem. 50, 4232-4241. https://doi.org/10.1021/bi101671p
Mallefet, J. and Shimomura, O. (1995). Presence of coelenterazine in mesopelagic fishes from the Strait of Messina. Mar. Biol. 124, 381-385. https://doi.org/10.1007/BF00363911
Mallefet, J., Duchatelet, L. and Coubris, C. (2020). Bioluminescence induction in the ophiuroid Amphiura filiformis (Echinodermata). J. Exp. Biol. 223, jeb218719. https://doi.org/10.1242/jeb.218719
Markova, S.V., Vysotski, E.S., Blinks, J.R., Burakova, L.P., Wang, B.C. and Lee, J. (2002). Obelin from the bioluminescent marine hydroid Obelia geniculata: cloning, expression, and comparison of some properties with those of other Ca2+-regulated photoproteins. Biochem. 41(7), 2227-2236. https://doi.org/10.1021/bi0117910
Markova, S.V., Golz, S., Frank, L.A., Kalthof, B. and Vysotski, E.S. (2003). Cloning and expression of cDNA for a luciferase from the marine copepod Metridia longa – a novel secreted bioluminescent reporter enzyme. J. Biol. Chem. 279, 3212-3217. https://doi.org/10.1074/jbc.M309639200
Markova, S.V., Burakova, L.P., Golz, S., Malikova, N.P., Frank, L.A. and Vysotski, E.S. (2012). The light-sensitive photoprotein berovin from the bioluminescent ctenophore Beroe abyssicola: a novel type of Ca2+-regulated photoprotein. FEBS J. 279(5), 856-870. https://doi.org/10.1111/j.1742-4658.2012.08476.x
Markova, S.V. and Vysotski, E.S. (2015). Coelenterazine-dependent luciferases. Biochem. 80, 714-732. https://doi.org/10.1134/S0006297915060073
Markova, S.V., Larionova, M.D. and Vysotski, E.S. (2018). Shining light on the secreted luciferases of marine copepods: current knowledge and applications. Photochem. Photobiol. 95(3), 705-721. https://doi.org/10.1111/php.13077
Matsui, D., Nakano, S., Dadashipour, M. and Asano, Y. (2017). Rational identification of aggregation hotspots based on secondary structure and amino acid hydrophobicity. Sci. Rep. 7, 9558. https://doi.org/10.1038/s41598-017-09749-2
Mitani, Y., Futahashi, R., Niwa, K., Ohba, N. and Ohmiya, Y. (2013). Cloning and characterization of luciferase from a Fijian luminous click beetle. Photochem. Photobiol. 89(5), 1163-1169. https://doi.org/10.1111/php.12097
Mitani, Y., Yasuno, R., Isaka, M., Mitsuda, N., Futahashi, R., Kamagata, Y., Ohmiya, Y. (2018). Novel gene encoding a unique luciferase from the fireworm Odontsyllis undecimdonta. Sci. Rep. 8, 12789. https://doi.org/10.1038/s41598-018-31086-1
Mitani, Y., Yasuno, R., Futahashi, R., Oakley, T.H. and Ohmiya, Y. (2019). Luciferase gene of a Caribbean fireworm (Syllidae) from Puerto Rico. Sci. Rep. 9, 13015. https://doi.org/10.1038/s41598-019-49538-7
Müller, W.E.G., Kasueske, M., Wang, X., Schröder, H.C., Wang, Y., Pisignano, D. and Wiens, M. (2009). Luciferase a light source for the silica-based optical waveguides (spicules) in the demosponge Suberites domuncula. Cell. Mol. Life Sci. 66, 537. https://doi.org/10.1007/s00018-008-8492-5
Nakajima, Y., Kobayashi, K., Yamagishi, K., Enomoto, T. and Ohmiya, Y. (2004). cDNA cloning and characterization of a secreted luciferase from the luminous Japanese ostracod, Cypridina noctiluca. Biosci. Biotechnol. Biochem. 68(3), 565-570. https://doi.org/10.1271/bbb.68.565
Nakamura, H., Kishi, Y., Shimomura, O., Morse, D. and Hastings, J. W. (1989). Structure of dinoflagellate luciferin and its enzymic and nonenzymic air-oxidation products. J. Am. Chem. Soc. 111(19), 7607-7611. https://doi.org/10.1021/ja00201a050
Natashin, P.V., Ding, W., Eremeeva, E.V., Markova, S.V., Lee, J., Vysotski, E.S. and Liu, Z.J. (2014). Structures of the Ca2+-regulated photoprotein obelin Y138F mutant before and after bioluminescence support the catalytic function of a water molecule in the reaction. Acta Crystallogr., Sect. D: Biol. Crystallogr. 70(3), 720-732. https://doi.org/10.1107/S1399004713032434
Nelson, E.J., Tunsjø, H.S., Fidopiastis, P.M., Sørum, H. and Ruby, E.G. (2007). A novel lux operon in the cryptically bioluminescent fish pathogen Vibrio salmonicida is associated with virulence. Appl. Environ. Microbiol. 73(6), 1825-1833. https://doi.org/10.1128/AEM.02255-06
Nicolas, M.-T., Bassot, J.-M. and Shimomura, O. (1982). Polynoidin: a membrane photoprotein isolated from the bioluminescent system of scale-worms. Photochem. Photobiol. 35(2), 201-207. https://doi.org/10.1111/j.1751-1097.1982.tb03832.x
Oba, Y., Tsuduki, H., Kato, S.-I., Ojika, M. and Inouye, S. (2004). Identification of the luciferin-luciferase system and quantification of coelenterazine by Mass Spectrometry in the deep-sea luminous ostracod Conchoecia pseudodiscophora. ChemBioChem. 5(11), 1495-1499. https://doi.org/10.1002/cbic.200400102
Oba, Y., Sato, M., Ohta, Y. and Inouye, S. (2006). Identification of paralogous genes of firefly luciferase in the Japanese firefly, Luciola curciata. Gene. 368, 53-60. https://doi.org/10.1016/j.gene.2005.10.023
Oba, Y., Kato, S.-I., Ojika, M. and Inouye, S. (2009). Biosynthesis of coelenterazine in the deep-sea copepod, Metridia pacifica. Biochem. Biophys. Res. Commun. 390(3), 684-688. https://doi.org/10.1016/j.bbrc.2009.10.028
Oba, Y., Furuhashi, M. and Inouye, S. (2010a). Identification of a functional luciferase gene in the non-luminous diurnal firefly, Lucidina biplagiata. Insect Mol. Biol. 19(6), 737-743. https://doi.org/10.1111/j.1365-2583.2010.01027.x
Oba, Y., Kumazaki, M. and Inouye, S. (2010b). Characterization of luciferases and its paralogue in the Panamanian luminous click beetle Pyrophorus angustus: a click beetle luciferase lacks the fatty acyl-CoA synthetic activity. Gene. 452(1), 1-6. https://doi.org/10.1016/j.gene.2009.12.001
Oba, Y., Yoshida, M., Shintani, T., Furuhashi, M. and Inouye, S. (2012). Firefly luciferase genes from the subfamilies Psilocladinae and Ototretinae (Lampyridae, Coleoptera). Comp. Biochem. Physiol. B., Biochem. Mol. Biol. 161(2), 110-116. https://doi.org/10.1016/j.cbpb.2011.10.001
Ohmiya, Y., Ohba, N., Toh, H. and Tsujii, F.I. (1995). Cloning, expression and sequence analysis of cDNA for the luciferases from the Japanese fireflies, Pyrocoelia tniyako and Hoturia parvula. Photochem. Photobiol. 62(2), 309-313. https://doi.org/10.1111/j.1751-1097.1995.tb05273.x
Ohmiya, Y., Sumiya, M., Viviani, V.R. and Ohba, N. (2000). Comparative aspects of a luciferase molecule from the Japanese luminous beetle, Rhagophthalmus ohbai. Sci. Rep. Yokosuka City Mus. 47, 31-38.
Ohtsuka, H., Rudie, N.G. and Wampler, J.E. (1976). Structural identification and synthesis of luciferin from the bioluminescent earthworm, Diplocardia longa. Biochem. 15(5), 1001-1004. https://doi.org/10.1021/bi00650a009
Okamoto, O.K., Liu, L., Robertson, D.L. and Hasting, J.W. (2001). Members of a dinoflagellate luciferase gene family differ in synonymous substitution rates. Biochem. 40(51), 15862-15868. https://doi.org/10.1021/bi011651q
Pes, O., Midlik, A., Schlaghamersky, J., Zitnan, M. and Taborsky, P. (2016). A study on bioluminescence and photoluminescence in the earthworm Eisenia lucens. Photochem. Photobiol. Sci. 15(2), 175–180. https://doi.org/10.1039/C5PP00412H
Petushkov, V.N., Dubinnyi, M.A., Tsarkova, A.S., Rodionova, N.S., Baranov, M.S., Kublitski, V.S., Shimomura, O. and Yampolsky, I.V. (2014). A novel type of luciferin from the Siberian luminous earthworm Fridericia heliota: structure elucidation by spectral studies and total synthesis. Angew. Chem. Int. Ed. 126(22), 5672-5674; https://doi.org/10.1002/anie.201400529
Plyuscheva, M. and Martin, D. (2009). On the morphology of elytra as luminescent organs in scale‐worms (Polychaeta, Polynoidae). Zoosymposia. 2, 379-389. https://doi.org/10.11646/zoosymposia.2.1.26
Powers, M.L., McDermott, A.G., Shaner, N.C. and Haddock, S.H.D. (2013). Expression and characterization of the calcium-activated photoprotein from the ctenophore Bathocyroe fosteri: insights into light-sensitive photoproteins. Biochem. Biophys. Commun. 431(2), 360-366. https://doi.org/10.1016/j.bbrc.2012.12.026
Purtov, K.V., Petushkov, V.N., Baranov, M.S., Mineev, K.S., Rodionova, N.S., Kaskova, Z.M., et al. (2015). The chemical basis of fungal bioluminescence. Angewandte Chemie. 127(28), 8242-8246. https://doi.org/10.1002/ange.201501779
Rawat, R. and Deheyn, D.D. (2016). Evidence that ferritin is associated with light production in the mucus of the marine worm Chaetopterus. Sci. Rep. 6(1), 1-14. https://doi.org/10.1038/srep36854
Rees, J.F., Thompson, E.M., Baguet, F. and Tsuji, F.I. (1990). Detection of coelenterazine and related luciferase activity in the tissues of the luminous fish, Vinciguerria attenuate. Comp. Biochem. Physiol. A, Physiol. 96A(3), 425-430. https://doi.org/10.1016/0300-9629(90)90107-4
Rodionova, N.S., Bondar, V.S. and Petushkov, V.N. (2003). ATP is a cosubstrate of the luciferase of the earthworm Fridericia heliota (Annelida: Clitellata: Oligochaeta: Enchytraeidae). Doklady Biochemistry and Biophysics. 392, 253-255. https://doi.org/10.1023/a:1026134628735
Sala-Newby, G.B., Thomson, C.M. and Campbell, A.K. (1996). Sequence and biochemical similarities between the luciferases of the glow-worm Lampyris noctiluca and the firefly Photinus pyralis. Biochem. J. 313(3), 761-767. https://doi.org/10.1042/bj3130761
Schnitzler, C.E., Pang, K., Powers, M.L. et al. (2012). Genomic organization, evolution, and expression of photoprotein and opsin genes in Mnemiopsis leidyi: a new view of ctenophore photocytes. BMC Biol. 10, 107. https://doi.org/10.1186/1741-7007-10-107
Schultz, D.T., Kotlobay, A.A., Ziganshin, R., Bannikov, A., Markina, N.M., Chepurnyh, T.V., Shakhova, E.S., Palkina, K., Haddock, S.H.D., Yampolsky, I.V., Oba, Y. (2018) Luciferase of the Japanese syllid polychaete Odontosyllis umdecimdonta. Biochem. Biophys. Res. Commun. 502(3), 318-323. https://doi.org/10.1016/j.bbrc.2018.05.135
Sharpe, M.L., Dearden, P.K., Gimenez, G. and Krause, K.L. (2015). Comparative RNA seq analysis of the New Zealand glowworm Arachnocampa luminosa reveals bioluminescence-related genes. BMC Genomics. 16, 825. https://doi.org/10.1186/s12864-015-2006-2
Shimomura, O., Goto, T. and Hirata, Y. (1957). Crystalline Cypridina luciferin. Bull. Chem. Soc. Jpn. 30(8), 929-933. https://doi.org/10.1246/bcsj.30.929
Shimomura, O., Johnson, F.H. and Saiga, Y. (1963). Partial purification and properties of the Odontosyllis luminescence system. J. Cell. Comp. Physiol. 61, 275-92. https://doi.org/10.1002/jcp.1030610309
Shimomura, O. and Johnson, F.H. (1968). Purification and properties of the luciferase and of a protein cofactor in the bioluminescence system of Latia neritoides. Biochem. 7(7), 2574-2580. https://doi.org/10.1021/bi00847a019
Shimomura, O., Johnson, F.H. and Kohama, Y. (1972). Reactions involved in bioluminescence systems of limpet (Latia neritoides) and luminous bacteria. Proc. Natl. Acad. Sci. U. S. A. 69(8), 2086-2089. https://doi.org/10.1073/pnas.69.8.2086
Shimomura, O. and Johnson, F.H. (1979). Comparison of the amounts of key components in the bioluminescence systems of various coelenterates. Comp. Biochem. Physiol. B, Comp. Biochem. 64(1), 105-107. https://doi.org/10.1016/0305-0491(79)90191-3
Shimomura, O., Inoue, S., Johnson, F.H. and Haneda, Y. (1980). Widespread occurrence of coelenterazine in marine bioluminescence. Comp. Biochem. Physiol. B, Comp. Biochem. 65(2), 435-437. https://doi.org/10.1016/0305-0491(80)90044-9
Shimomura, O. (1984). Porphyrin chromophores in Luminodesmus photoprotein. Comp. Biochem. Physiol. 79B, 565–567. https://doi.org/10.1016/0305-0491(84)90367-5
Shimomura, O. (1986). Bioluminescence of the brittle star Ophiopsila californica. Photochem. Photobiol. 44(5), 671-674. https://doi.org/10.1111/j.1751-1097.1986.tb04724.x
Shimomura, O. and Flood, P.R. (1998). Luciferase of the Scyphozoan Medusa Periphylla periphylla. The Biological Bulletin. 194(3), 244-251. https://doi.org/10.2307/1543094
Shimomura, O., Flood, P.R., Inouye, S., Bryan, B., Shimomura, A. (2001) Isolation and properties of the luciferase stored in the ovary of the Scyphozoan Medusa Periphylla periphylla. Biol. Bull. 201(3), 339-347. https://doi.org/10.2307/1543612
Shimomura, O. (2006). Bioluminescence: chemical principles and methods. World Scientific.
Shimomura, O. (2008). The photoproteins. Protein Science Encyclopedia: Online. 1-23. https://doi.org/10.1002/9783527610754.mp12
Silva Neto, A.J., Scorsato, V., Arnoldi, F.G.C. and Viviani, V.R. (2009). Pyrearinus termitilluminans larval click beetle luciferase: active site properties, structure and function relationships and comparison with other beetle luciferase. Photochem. Photobiol. Sci. 8(12), 1748. https://doi.org/10.1039/b9pp00053d
Stepanyuk, G.A., Liu, Z.J., Burakova, L.P., Lee, J., Rose, J., Vysotski, E.S. and Wang, B.C. (2013). Spatial structure of the novel light-sensitive photoprotein berovin from the ctenophore Beroe abyssicola in the Ca2+-loaded apoprotein conformation state. BBA-Proteins Proteom. 1834(10), 2139-2146. https://doi.org/10.1016/j.bbapap.2013.07.006
Stolz, U., Velez, S., Wood, K.V., Wood, M. and Feder, J.L. (2003). Darwinian natural selection for orange bioluminescent color in a Jamaican click beetle. Proc. Natl. Acad. Sci. U. S. A. 100(25), 14955-14959. https://doi.org/10.1073/pnas.2432563100
Szittner, R. and Meighen, E. (1990). Nucleotide sequence, expression, and properties of luciferase coded by lux genes from a terrestrial bacterium. J. Biol. Chem. 265, 16581-16587.
Takahashi, H. and Isobe, M. (1994). Photoprotein of luminous squid, Symplectoteuthis oualaniensis and reconstruction of the luminous system. Chem. Lett. 23(5), 843-846. https://doi.org/10.1246/cl.1994.843
Takenaka, Y., Masuda, H., Yamaguchi, A., Nishikawa, S., Shigeri, Y., Yoshida, Y. and Mizuno, H. (2008). Two forms of secreted and thermostable luciferases from the marine copepod crustacean, Metridia pacifica. Gene. 425(1-2), 28-35. https://doi.org/10.1016/j.gene.2008.07.041
Takenaka, Y., Yamaguchi, A., Tsuruoka, N., Torimura, M., Gojobori, T. and Shigeri, Y. (2012). Evolution of bioluminescence in marine copepods. Mol. Biol. Evol. 29(6), 1669-1681. https://doi.org/10.1093/molbev/mss009
Takenaka, Y., Noda-Ogura, A., Imanishi, T., Yamaguchi, A., Gojobori, T. and Shigeri, Y. (2013). Computational analysis and functional expression of ancestral copepod luciferase. Gene. 528(2), 201-205. https://doi.org/10.1016/j.gene.2013.07.011
Tatsumi, H., Kajiyama, N. and Nakano, E. (1992). Molecular cloning and expression in Escherichia coli of a cDNA clone encoding luciferase of a firefly, Luciola lateralis. BBA-Struct. Expr. 1131(2), 161-165. https://doi.org/10.1016/0167-4781(92)90071-7
Tessler, M., Gaffney, J.P., Crawford, J.M., Trautman, E., Gujarati, N.A., Alatalo, P., Pieribone, V.A. and Gruber, D.F. (2018). Luciferin production and luciferase transcription in the bioluminescent copepod Metridia lucens. PeerJ. 6, e5506. https://doi.org/10.7717/peerj.5506
Tessler, M. Gaffney, J.P., Oliveira, G.A., Guarnaccia, A., Dobi, K.C., Gujarati, N.A., Galbraith, M., Mirza, J.D., Sparks, J.S., Pieribone, V.A., Wood, R.J. and Gruber, D.F. (2020). A putative chordate luciferase from a cosmopolitan tunicate indicates convergent bioluminescence evolution across phyla. Sci. Rep. 10, 17724. https://doi.org/10.1038/s41598-020-73446-w
Titushin, M.S., Markova, S.V., Frank, L.A., Malikova, N.P., Stepanyuk, G.A., Lee, J. and Vysotski, E.S. (2008). Coelenterazine-binding protein of Renilla muelleri: cDNA cloning, overexpression, and characterization as a substrate of luciferase. Photochem. Photobiol. Sci. 7(2), 189-196. https://doi.org/10.1039/B713109G
Titushin, M.S., Feng, Y., Stepanyuk, G.A., Li, Y., Markova, S.V., Golz, S., Wang, B.-C., Lee, J., Wang, J., Vysotski, E.S. and Liu, Z.-J. (2010). NMR-derived topology of a GFP-photoprotein energy transfer complex. J. Biol. Chem. 285, 40891-40900. https://doi.org/10.1074/jbc.M110.133843
Thompson, E.M., Nagata, S. and Tsuji, F.I. (1989). Cloning and expression of cDNA for the luciferase from the marine ostracod Vargula hilgendorfii. Proc. Natl. Acad. Sci. U. S. A. 86(17), 6567-6571. https://doi.org/10.1073/pnas.86.17.6567
Thompson, C., Herring, P.J. and Campbell, A.K. (1995a). Coelenterazine distribution and luciferase characteristics in oceanic decapod crustaceans. Mar. Biol. 124, 197-207. https://doi.org/10.1007/BF00347123
Thompson, C., Herring, P.J. and Campbell, A.K. (1995b). Evidence for de novo biosynthesis of coelenterazine in the bioluminescent midwater shrimp, Systellaspis debilis C. J. Mar. Biol. Assoc. U. K. 75(1), 165-171. https://doi.org/10.1017/S0025315400015277
Thompson, C., Herring, P.J. and Campbell, A.K. (1997). The widespread occurrence and tissue distribution of the imidazolopyrazine luciferins. J. Biolum. Chemilum. 12(2), 87-91. https://doi.org/10.1002/(SICI)1099-1271(199703/04)12:2<87::AID-BIO438>3.0.CO;2-8
Tsuji, F.I., Barnes, A.T. and Case, J.F. (1972). Bioluminescence in the marine teleost, Porichthys notatus, and its induction in a non-luminous form by Cypridina (Ostracod) luciferin. Nature. 237, 515-516. https://doi.org/10.1038/237515a0
Tsujii, F.I. (2002). Bioluminescence reaction catalyzed by membrane-bound luciferase in the “firefly squid”, Watasenia scintillans. BBA-Biomembranes. 1564(1), 189-197. https://doi.org/10.1016/S0005-2736(02)00447-9
Tsutomu, M., Hiroki, T. and Eiichi, N. (1989). Cloning and sequence analysis of cDNA for luciferase of a Japanese firefly, Luciola cruciata. Gene. 77(2), 265-270. https://doi.org/10.1016/0378-1119(89)90074-7
Urbanczyk, H., Ast, J.C., Kaeding, A.J., Oliver, J.D. and Dunlap, P.V. (2008). Phylogenetic analysis of the incidence of lux gene horizontal transfer in Vibrionaceae. J. Bacteriol. 190(10), 3494-3504. https://doi.org/10.1128/JB.00101-08
Urbanczyk, H., Furukawa, T., Yamamoto, Y. and Dunlap, P.V. (2012). Natural replacement of vertically inherited lux-rib genes of Photobacterium aquimaris by horizontally acquired homologues. Environ. Microbiol. Rep. 4(4), 412-416. https://doi.org/10.1111/j.1758-2229.2012.00355.x
Verhaegen, M. and Christopoulos, T.K. (2002). Recombinant Gaussia luciferase. Overexpression, purification, and analytical application of a bioluminescent reporter for DNA hybridization. Anal. Chem. 74(17), 4378-4385. https://doi.org/10.1021/ac025742k
Viviani, V.R., Bechara, E.J.H. and Ohmiya, Y. (1999a). Cloning, sequence analysis, and expression of active Phrixothrix railroad-worms luciferases: relationship between bioluminescence spectra and primary structures. Biochem. 38(26), 8271-8279. https://doi.org/10.1021/bi9900830
Viviani, V.R., Silva, J.R., Perez, G.L.O., Santelli, R.V., Bechara, E.J.H. and Reinach, F.C. (1999b). Cloning and molecular characterization of the cDNA for the Brazilian larval click-beetle Pyrearinus termitilluminans luciferase. Photochem. Photobiol. 70(2), 254-260. https://doi.org/10.1111/j.1751-1097.1999.tb07997.x
Viviani, V.R., Hastings J.W. and Wilson, T. (2002). Two bioluminescent Diptera: The North American Orfelia fultoni and the Australian Arachnocampa flava. Similar niche, different bioluminescence systems. Photochem. Photobiol. 75(1), 22-27. https://doi.org/10.1562/0031-8655(2002)0750022TBDTNA2.0.CO2
Viviani, V.R., Arnoldi, F.G.C., Brochetto-Braga, M. and Ohmiya, Y. (2004). Cloning and characterization of the cDNA for the Brazilian Cratomorphus distinctus larval firefly luciferase: similarities with European Lampyris noctiluca and Asiatic Pyrocoelia luciferases. Comp. Biochem. Physiol. B, Biochem. Mol. Biol. 139(2), 151-156. https://doi.org/10.1016/j.cbpc.2004.05.012
Viviani, V.R., Amaral, D.T., Prado, R. and Arnoldi, F.G.C. (2011). A new blue-shifted luciferase from the Brazilian Amydetes fanestratus (Coleoptera: Lampyridae) firefly: molecular evolution and structural/functional properties. Photochem. Photobiol. Sci. 10(12), 1879-1886. https://doi.org/10.1039/C1PP05210A
Viviani, V.R., Silva, J.R., Amaral, D.T., Bevilaqua, V.R., Abdalla, F.C., Branchini, B.R. and Johnson, C.H. (2020). A new brilliantly blue-emitting luciferin-luciferase system from Orfelia fultoni and Keroplatinae (Diptera). Sci. Rep. 10, 9608. https://doi.org/10.1038/s41598-020-66286-1
Vysotski, E.S., Liu, Z.J., Rose, J., Wang, B.C. and Lee, J. (1999). Preparation and preliminary study of crystals of the recombinant calcium-regulated photoprotein obelin from the bioluminescent hydroid Obelia longissima. Acta Crystallogr., Sect. D, Biol. Crystallogr. 55(11), 1965-1966. https://doi.org/10.1107/S090744499901182
Vysotski, E.S., Liu, Z.J., Markova, S.V., Blinks, J.R., Deng, L., Frank, L.A., Herko, M., Malikova, N.P., Rose, J.P., Wang, B.C. and Lee, J. (2003). Violet bioluminescence and fast kinetics from W92F obelin: structure-based proposals for the bioluminescence triggering and identification of the emitting species. Biochem. 42, 6013-6024. https://doi.org/10.1021/bi027258h
Wampler, J.E. and Jamieson, B.G.M. (1980). Earthworm bioluminescence: Comparative physiology and biochemistry. Comp. Biochem. Physiol. B, Comp. Biochem. 66(1), 43–50. https://doi.org/10.1016/0305-0491(80)90081-4
Wampler, J.E. (1982). The bioluminescent system of Microscolex phosphoreus and its similarities to those of other bioluminescent earthworms (Oligochaeta). Comp. Biochem. Physiol. 71A(4), 599-604. https://doi.org/10.1016/0300-9629(82)90209-2
Wang, K., Hong, W., Jiao, H. and Zhao, H. (2017). Transcriptome sequencing and phylogenetic analysis of four species of luminescent beetles. Sci. Rep. 7, 1814. https://doi.org/10.1038/s41598-017-01835-9
Ward, W.W. and Seliger, H.H. (1974). Properties of mnemiopsin and berovin, calcium-activated photoproteins from the ctenophores Mnemiopsis sp. and Beroë ovata. Biochem. 13(7), 1500-1510. https://doi.org/10.1021/bi00704a028
Watkins, O.C., Sharpe, M.L., Perry, N.B. and Krause, K.L. (2018). New Zealand glowworm (Arachnocampa luminosa) bioluminescence is produced by a firefly-like luciferase but an entirely new luciferin. Sci. Rep. 8, 3278. https://doi.org/10.1038/s41598-018-21298-w
Wenxin, L., Jun, Z., Shaowei, L., Tong, C., Min, C., Shaojing, L. and Ningshao, X. (2004). Cloning and expression of the aequorin genes from jellyfish Aequorea and characterization of aequorins activities. Acta Oceanol. Sin. 26(4), 110-117.
Wood, K.V., Lam, Y.A., Seliger, H.H. and McElroy, W.D. (1989). Complementary DNA coding click beetle luciferases can elicit bioluminescence of different colors. Science. 244(4905), 700-702. https://doi.org/10.1126/science.2655091
Xia, N.S., Luo, W.X., Zhang, J., Xie, X.Y., Yang, H.J., Li, S.W., Chen, M. and Ng, M.H. (2002). Bioluminescence of Aequorea macrodactyla, a common jellyfish species in the East China Sea. Mar. Biotechnol. 4(2), 155-162. https://doi.org/10.1007/s10126-001-0081-7
Ye, L., Buck, L.M., Schaeffer, H.J. and Leach, F.R. (1997). cloning and sequencing of a cDNA for firefly luciferase from Photuris pennsylvanica. BBA- Protein Struct. Mol. Enzymol. 1339(1), 39-52. https://doi.org/10.1016/S0167-4838(96)00211-7
Zhang, E., Imada, C., Kamata, M., Kobayashi, T. and Hamada-Sato, N. (2008). Improved method of protoplast fusion between marine luminescent bacterium and Escherichia coli cultivated with fatty acid. Fish. Sci. 74, 1290. https://doi.org/10.1111/j.1444-2906.2008.01654.x
